# Supplementary material for: How introduction of hydrolyzable moieties in POx influences particle formation – a library approach based on block copolymers comprising polyesters
Source: Royal Society of Chemistry journal article supplement (doi:10.1039/d3lp00085k), 2023-09-12
Supplement: d3lp00085k1.pdf [file d3lp00085k1.pdf]

# Supporting Information

## How introduction of hydrolyzable moieties in POx influences particle formation – A library approach based on block copolymers comprising polyesters

*Natalie E. Göppert,<sup>a,b</sup> , Antje Vollrath,<sup>a,b</sup> Leanne M. Stafast,<sup>a,b</sup> Steffi Stumpf,<sup>a,b</sup> Bianca  
Schulze,<sup>a,b</sup> Stephanie Hoepfener<sup>a,b</sup> Christine Weber,<sup>a,b</sup> Ulrich S. Schubert<sup>\*a,b</sup>*

<sup>a</sup>Laboratory of Organic and Macromolecular Chemistry (IOMC), Friedrich Schiller University  
Jena, Humboldtstr. 10, 07743 Jena, Germany.

<sup>b</sup>Jena Center for Soft Matter (JCSM), Friedrich Schiller University Jena, Philosophenweg 7,  
07743 Jena, Germany

## EXPERIMENTAL SECTION

### Synthesis of azido-terminated poly(ethylene imine-*stat*-glycine) with 15% DO, oxPEI<sub>15%</sub>-N<sub>3</sub>

oxPEI<sub>15%</sub>-N<sub>3</sub> was synthesized following the general method using PEI-N<sub>3</sub> (3.03 g, 1.68 mmol, 68.3 mmol amino units) and hydrogen peroxide solution (30% w/w, 2.31 mL, 0.33 equiv. per amino unit). oxPEI<sub>15%</sub>-N<sub>3</sub> was obtained as a slightly yellow solid (3.21 g, quantitative).

$$M_{n,\text{theor.}} = 1,900 \text{ g mol}^{-1}.$$

<sup>1</sup>H NMR (300 MHz, D<sub>2</sub>O):  $\delta$  = 8.05–7.83 (br, NH–CO–CH<sub>2</sub>, glycine unit), 3.74–3.23 (br, NH–CO–CH<sub>2</sub>, glycine unit and CH<sub>2</sub>–CH<sub>2</sub>, EtOx unit), 3.23–2.49 (br, NH–CH<sub>2</sub>–CH<sub>2</sub>, ethylene imine unit), 2.49–2.32 (br, CO–CH<sub>2</sub>–CH<sub>3</sub>, EtOx unit), 1.20–0.94 ppm (br, CO–CH<sub>2</sub>–CH<sub>3</sub>, EtOx unit); degree of oxidation (DO) = 15%.

SEC (DMAc, 0.21 wt% LiCl, RI detection, PS calibration):  $M_n = 2,200 \text{ g mol}^{-1}$ ;  $\bar{D} = 1.75$ .

ART-IR:  $\nu(\text{N}_3) = 2,099 \text{ cm}^{-1}$ .

### Synthesis of azido-terminated poly(ethylene imine-*stat*-glycine) with 32% DO, oxPEI<sub>32%</sub>-N<sub>3</sub>

oxPEI<sub>32%</sub>-N<sub>3</sub> was synthesized following the general procedure using PEI-N<sub>3</sub> (3.05 g, 1.69 mmol, 68.7 mmol amino units) and hydrogen peroxide solution (30% w/w, 3.42 mL, 0.49 equiv. per amino unit) oxPEI<sub>32%</sub>-N<sub>3</sub> was obtained as a yellow solid (3.16 g, 95%).

$$M_{n,\text{theor.}} = 2,000 \text{ g mol}^{-1}.$$

<sup>1</sup>H NMR (300 MHz, D<sub>2</sub>O):  $\delta$  = 8.06–7.81 (br, NH–CO–CH<sub>2</sub>, glycine unit), 3.72–3.24 (br, NH–CO–CH<sub>2</sub>, glycine unit and CH<sub>2</sub>–CH<sub>2</sub>, EtOx unit), 3.24–2.53 (br, NH–CH<sub>2</sub>–CH<sub>2</sub>, ethylene imine

unit), 2.53–2.23 (br, CO–CH<sub>2</sub>–CH<sub>3</sub>, EtOx unit), 1.19–0.94 ppm (br, CO–CH<sub>2</sub>–CH<sub>3</sub>, EtOx unit);  
DO = 32%.

SEC (DMAc, 0.21 wt% LiCl, RI detection, PS calibration):  $M_n = 1,500 \text{ g mol}^{-1}$ ;  $\bar{D} = 1.64$ .

ATR-IR:  $\nu(\text{N}_3) = 2,100 \text{ cm}^{-1}$ .

### **Synthesis of azido-terminated poly(ethylene imine-*stat*-glycine) with 47% DO, oxPEI<sub>47%</sub>-N<sub>3</sub>**

oxPEI<sub>47%</sub>-N<sub>3</sub> was synthesized according to the general procedure using PEI-N<sub>3</sub> (3.16 g, 1.76 mmol, 71.3 mmol amino units) and hydrogen peroxide solution (30% w/w, 5.50 mL, 0.76 equiv. per amino unit). oxPEI<sub>47%</sub>-N<sub>3</sub> was obtained as a light brown solid (yield: 3.39 g, 93%).

$M_{n,\text{theor.}} = 2,100 \text{ g mol}^{-1}$ .

<sup>1</sup>H NMR (300 MHz, D<sub>2</sub>O):  $\delta = 8.08\text{--}7.84$  (br, NH–CO–CH<sub>2</sub>, glycine unit), 3.75–3.25 (br, NH–CO–CH<sub>2</sub>, glycine unit and CH<sub>2</sub>–CH<sub>2</sub>, EtOx unit), 3.25–2.45 (br, NH–CH<sub>2</sub>–CH<sub>2</sub>, ethylene imine unit), 2.45–2.24 (br, CO–CH<sub>2</sub>–CH<sub>3</sub>, EtOx unit), 1.20–0.95 ppm (br, CO–CH<sub>2</sub>–CH<sub>3</sub>, EtOx unit);  
DO = 47%.

SEC (DMAc, 0.21 wt% LiCl, RI detection, PS calibration):  $M_n = 1,500 \text{ g mol}^{-1}$ ;  $\bar{D} = 1.62$ .

ATR-IR:  $\nu(\text{N}_3) = 2,100 \text{ cm}^{-1}$ .

**Table S1:** Details on the synthesis of azido-terminated poly(2-methyl-2-oxazoline-*stat*-glycine)s and poly(2-ethyl-2-oxazoline-*stat*-glycine)s.

|                                           | m (oxPEI)<br>[g] | n (acetyl<br>chloride)<br>[mmol] | V (acetyl<br>chloride)<br>[mL] | n (propionyl<br>chloride)<br>[mmol] | V (propionyl<br>chloride)<br>[mL] | n (NEt <sub>3</sub> )<br>[mmol] | V (NEt <sub>3</sub> )<br>[mL] | Yield<br>[g] | Yield<br>[%] | M <sub>n,theor.</sub> <sup>a</sup><br>[g mol <sup>-1</sup> ] |
|-------------------------------------------|------------------|----------------------------------|--------------------------------|-------------------------------------|-----------------------------------|---------------------------------|-------------------------------|--------------|--------------|--------------------------------------------------------------|
| <b>dPEtOx<sub>15%</sub>-N<sub>3</sub></b> | 1.2              | -                                | -                              | 64                                  | 5.6                               | 86                              | 12                            | 1.1          | 46           | 3,800                                                        |
| <b>dPMeOx<sub>15%</sub>-N<sub>3</sub></b> | 1.2              | 63                               | 4.5                            | -                                   | -                                 | 86                              | 12                            | 1.3          | 63           | 3,300                                                        |
| <b>dPEtOx<sub>32%</sub>-N<sub>3</sub></b> | 1.2              | -                                | -                              | 49                                  | 4.2                               | 65                              | 9                             | 0.9          | 41           | 3,500                                                        |
| <b>dMeOx<sub>32%</sub>-N<sub>3</sub></b>  | 1.2              | 48                               | 3.4                            | -                                   | -                                 | 65                              | 9                             | 1.3          | 71           | 3,100                                                        |
| <b>dPEtOx<sub>47%</sub>-N<sub>3</sub></b> | 1.2              | -                                | -                              | 36                                  | 3.1                               | 48                              | 6.7                           | 1.2          | 66           | 3,200                                                        |
| <b>dPMeOx<sub>47%</sub>-N<sub>3</sub></b> | 1.2              | 36                               | 2.5                            | -                                   | -                                 | 48                              | 6.7                           | 1.4          | 81           | 2,900                                                        |

<sup>a</sup>Obtained by calculation using theoretical units from degree of polymerization, degree of hydrolysis and DO from <sup>1</sup>H NMR.

**Table S2:** Details on the synthesis of the block copolymers.

|                                          | m(dPMeOx)<br>[mg] | n(dPMeOx)<br>[ $\mu$ mol] | m(dPEtOx)<br>[mg] | n(dPEtOx)<br>[ $\mu$ mol] | m(PLA)<br>[mg] | n(PLA)<br>[ $\mu$ mol] | m(PCL)<br>[mg] | n(PCL)<br>[ $\mu$ mol] | Method<br>* | Yield<br>[mg] | Yield<br>[%] | $M_{n,theor.}^a$<br>[kg mol <sup>-1</sup> ] |
|------------------------------------------|-------------------|---------------------------|-------------------|---------------------------|----------------|------------------------|----------------|------------------------|-------------|---------------|--------------|---------------------------------------------|
| <b>PEtOx-<i>b</i>-PLA</b>                | -                 | -                         | 60                | 15                        | 98             | 8.4                    | -              | -                      | A           | 108           | 77           | 13.3                                        |
| <b>PEtOx-<i>b</i>-PCL</b>                | -                 | -                         | 72                | 18                        | -              | -                      | 100            | 13                     | A           | 129           | 86           | 12.0                                        |
| <b>dPMeOx<sub>15%</sub>-<i>b</i>-PLA</b> | 55                | 17                        | -                 | -                         | 109            | 9.3                    | -              | -                      | B           | 115           | 71           | 12.6                                        |
| <b>dPMeOx<sub>15%</sub>-<i>b</i>-PCL</b> | 60                | 18                        | -                 | -                         | -              | -                      | 102            | 13                     | A           | 117           | 81           | 11.3                                        |
| <b>dPEtOx<sub>15%</sub>-<i>b</i>-PLA</b> | -                 | -                         | 60                | 16                        | 103            | 8.8                    | -              | -                      | B           | 53            | 37           | 13.1                                        |
| <b>dPEtOx<sub>15%</sub>-<i>b</i>-PCL</b> | -                 | -                         | 69                | 18                        | -              | -                      | 102            | 13                     | A           | 113           | 75           | 11.8                                        |
| <b>dPMeOx<sub>32%</sub>-<i>b</i>-PLA</b> | 50                | 16                        | -                 | -                         | 106            | 9.0                    | -              | -                      | B           | 116           | 82           | 12.4                                        |
| <b>dPMeOx<sub>32%</sub>-<i>b</i>-PCL</b> | 60                | 19                        | -                 | -                         | -              | -                      | 108            | 14                     | A           | 123           | 82           | 11.1                                        |
| <b>dPEtOx<sub>32%</sub>-<i>b</i>-PLA</b> | -                 | -                         | 100               | 28                        | 185            | 16                     | -              | -                      | A           | 196           | 77           | 12.8                                        |
| <b>dPEtOx<sub>32%</sub>-<i>b</i>-PCL</b> | -                 | -                         | 65                | 18                        | -              | -                      | 103            | 13                     | A           | 122           | 83           | 11.5                                        |
| <b>dPMeOx<sub>47%</sub>-<i>b</i>-PLA</b> | 45                | 16                        | -                 | -                         | 101            | 8.7                    | -              | -                      | A           | 104           | 78           | 12.2                                        |
| <b>dPMeOx<sub>47%</sub>-<i>b</i>-PCL</b> | 57                | 20                        | -                 | -                         | -              | -                      | 110            | 14                     | A           | 120           | 80           | 10.9                                        |
| <b>dPEtOx<sub>47%</sub>-<i>b</i>-PLA</b> | -                 | -                         | 45                | 14                        | 92             | 7.9                    | -              | -                      | B           | 78            | 64           | 12.5                                        |
| <b>dPEtOx<sub>47%</sub>-<i>b</i>-PCL</b> | -                 | -                         | 59                | 18                        | -              | -                      | 103            | 13                     | A           | 108           | 75           | 11.1                                        |

\* Method A: Precipitation in methanol (-80 °C). Method B: Precipitation in methanol (RT). <sup>a</sup>Obtained by calculation using theoretical units from degree of polymerization, degree of hydrolysis and DO from <sup>1</sup>H NMR.

## ADDITIONAL FIGURES DEPICTING POLYMER CHARACTERIZATION DATA

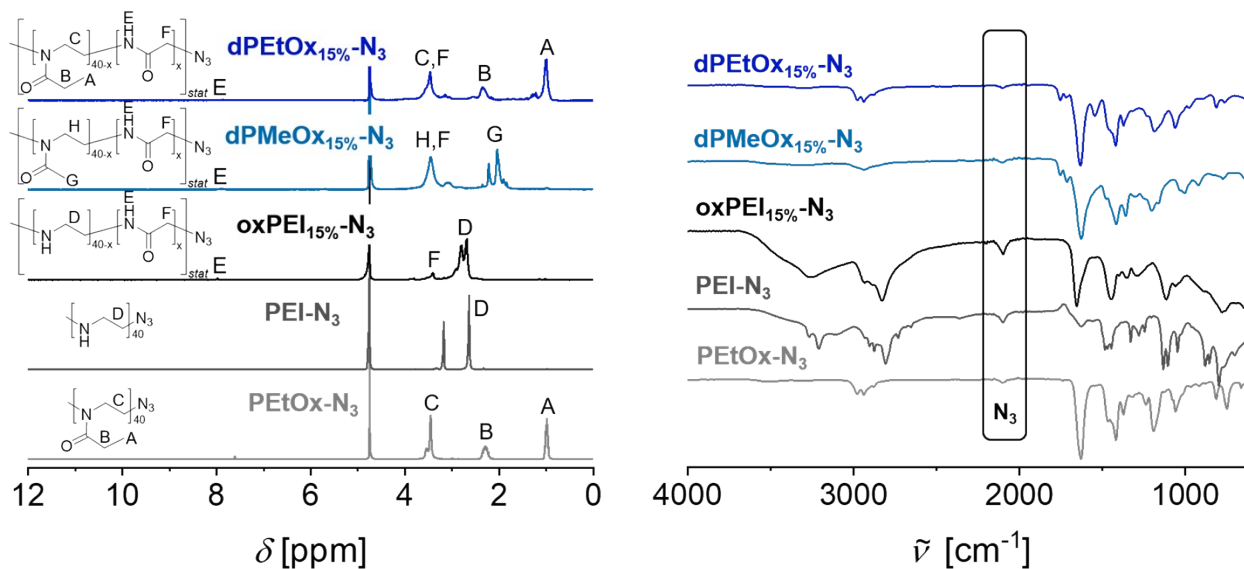

**Figure SI 1:** Analysis of the polymers within the synthesis sequence **PEtOx-N<sub>3</sub>**, **PEI-N<sub>3</sub>**, **oxPEI<sub>15%</sub>-N<sub>3</sub>**, **dPMeOx<sub>15%</sub>-N<sub>3</sub>** and **dPEtOx<sub>15%</sub>-N<sub>3</sub>** with a DO = 15%. Left: Overlay of the <sup>1</sup>H NMR spectra (300 MHz, D<sub>2</sub>O or MeOD) and assignment to the schematic representations of the structure of the polymer. Right: Overlay of the ATR-IR spectra (the characteristic azido vibration band is highlighted).

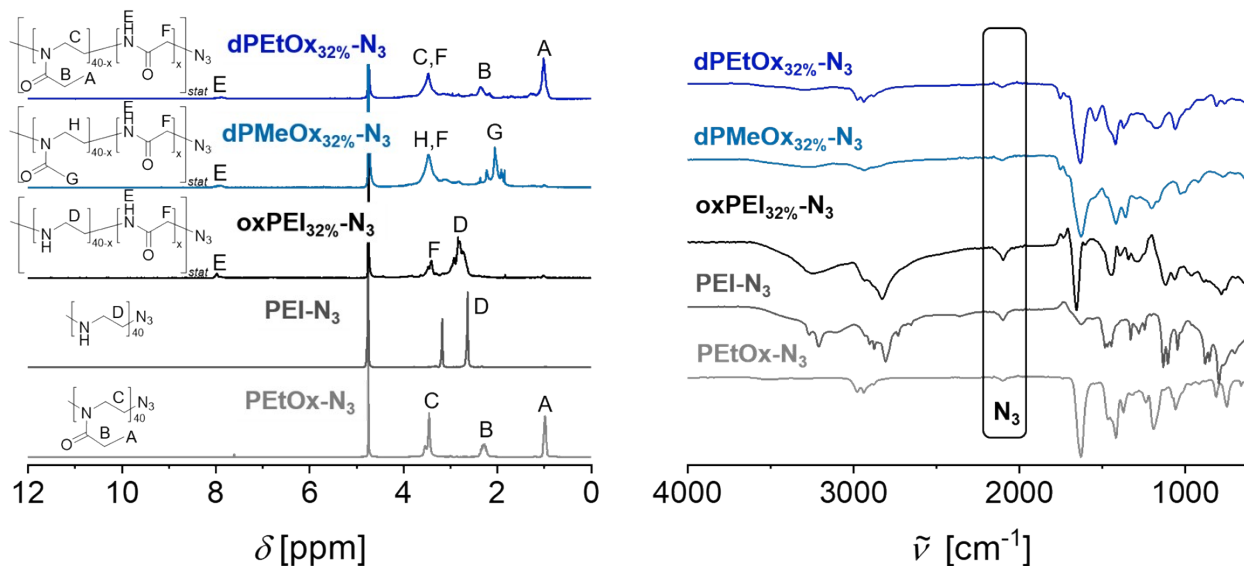

**Figure SI 2:** Analysis of the polymers within the synthesis sequence **PEtOx-N<sub>3</sub>**, **PEI-N<sub>3</sub>**, **oxPEI<sub>32%</sub>-N<sub>3</sub>**, **dPMeOx<sub>32%</sub>-N<sub>3</sub>** and **dPEtOx<sub>32%</sub>-N<sub>3</sub>** with a DO = 32%. Left: Overlay of the <sup>1</sup>H NMR spectra (300 MHz, D<sub>2</sub>O or MeOD) and assignment to the schematic representations of the structure of the polymer. Right: Overlay of the ATR-IR spectra (the characteristic azido vibration band is highlighted).

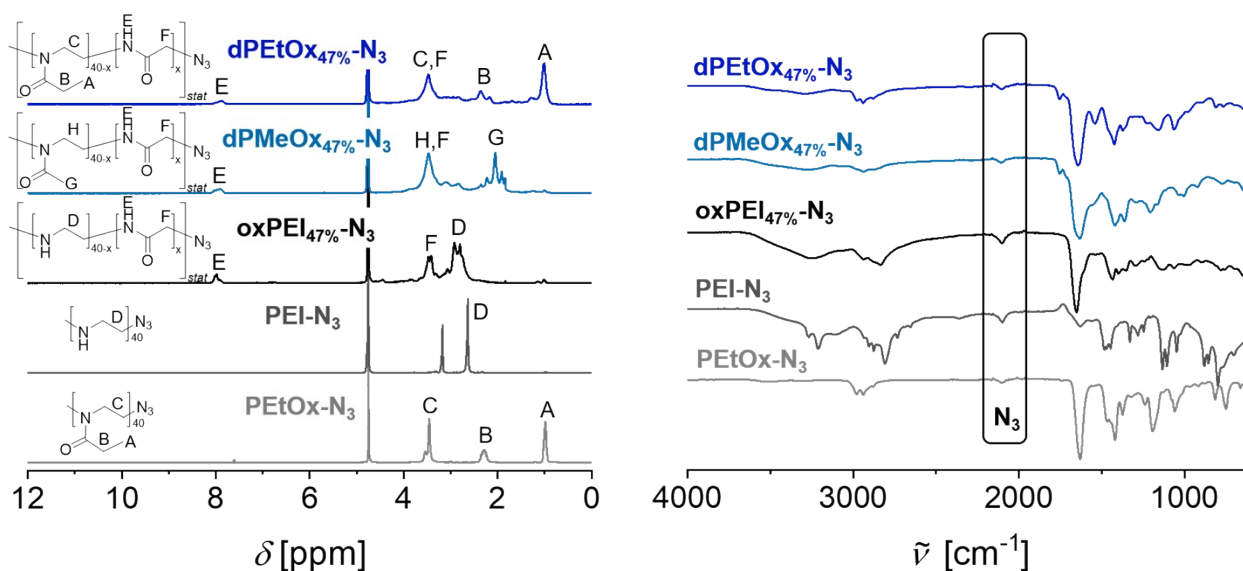

**Figure SI 3:** Analysis of the polymers within the synthesis sequence **PEtOx-N<sub>3</sub>**, **PEI-N<sub>3</sub>**, **oxPEI<sub>47%</sub>-N<sub>3</sub>**, and **dPMeOx<sub>47%</sub>-N<sub>3</sub>** and **dPEtOx<sub>47%</sub>-N<sub>3</sub>** with a DO = 47%. Left: Overlay of the <sup>1</sup>H NMR spectra (300 MHz, D<sub>2</sub>O or MeOD) and assignment to the schematic representations of the structure of the polymer. Right: Overlay of the ATR-IR spectra (the characteristic azido vibration band is highlighted).

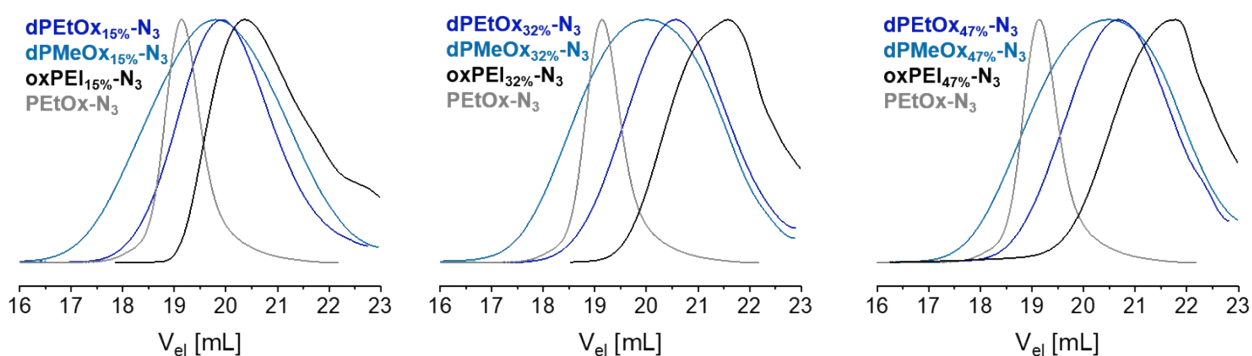

**Figure SI 4:** Overlay of the SEC elugrams (DMAC, RI detection) of the polymers within the synthesis sequence **PEtOx-N<sub>3</sub>**, **PEI-N<sub>3</sub>**, as well as the different **oxPEI-N<sub>3</sub>**, **dPMeOx-N<sub>3</sub>** and **dPEtOx-N<sub>3</sub>** with DO = 15%, 32% and 47%, respectively.



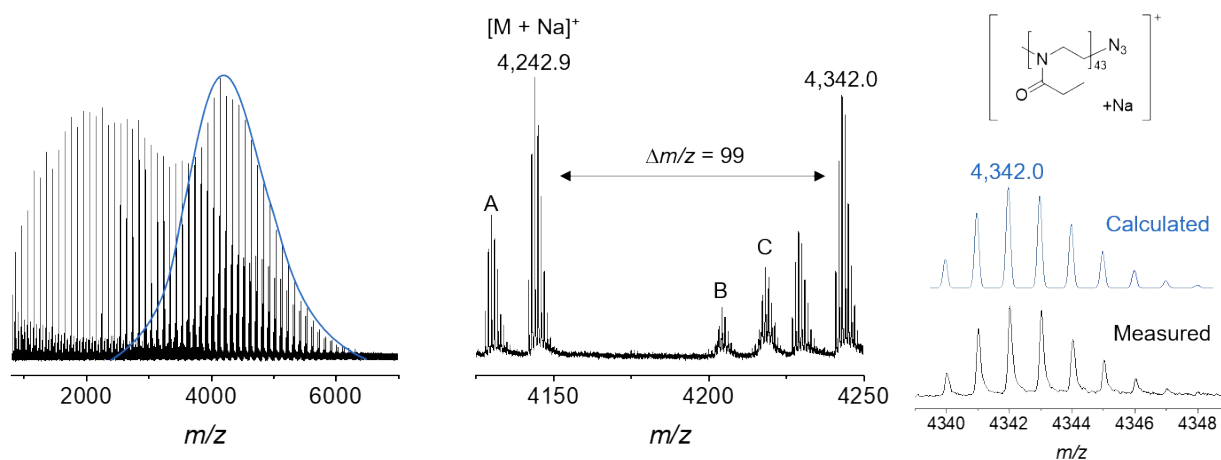

**Figure SI 5:** MALDI TOF MS analysis (matrix DCTB + NaTFA) of **PEtOx-N<sub>3</sub>**. Left: Full spectrum. Middle: Zoom into the  $m/z$  region of one repeating unit ( $\Delta m/z = 99$ ) with the assignment of the most abundant species (A:  $[\text{H}(\text{C}_5\text{H}_9\text{NO})_n\text{N}_3 + \text{Na}]^+$ , B:  $[\text{H}(\text{C}_5\text{H}_9\text{NO})_n\text{OH} + \text{Na}]^+$  and  $[\text{H}(\text{C}_5\text{H}_9\text{NO})_n\text{N} + \text{Na}]^+$ , C:  $[\text{H}_3\text{C}(\text{C}_5\text{H}_9\text{NO})_n\text{OH} + \text{Na}]^+$  and  $[\text{H}_3\text{C}(\text{C}_5\text{H}_9\text{NO})_n\text{N} + \text{Na}]^+$ ). Proton initiated species result from a chain transfer reaction commonly occurring in the CROP and are ionized preferably due to their lower molar mass.<sup>1, 2</sup> The N endgroup appeared as a result of the detachment of  $\text{N}_2$  due to the high laser energy applied in the measurement.<sup>3</sup> Right: Overlay of the measured and the calculated isotopic pattern of the most prominent species ( $[\text{M} + \text{Na}]^+$ ).

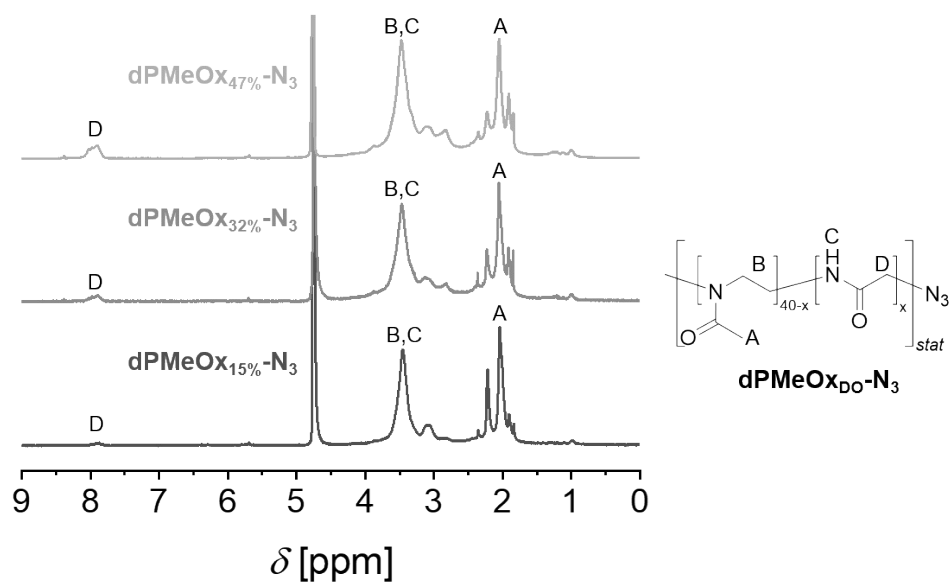

**Figure SI 6:** Overlay of the  $^1\text{H}$  NMR spectra (300 MHz,  $\text{D}_2\text{O}$ ) of the  $\text{dPMeOx-N}_3$  with the different DO. Spectra are normalized according to the intensity of signal A.

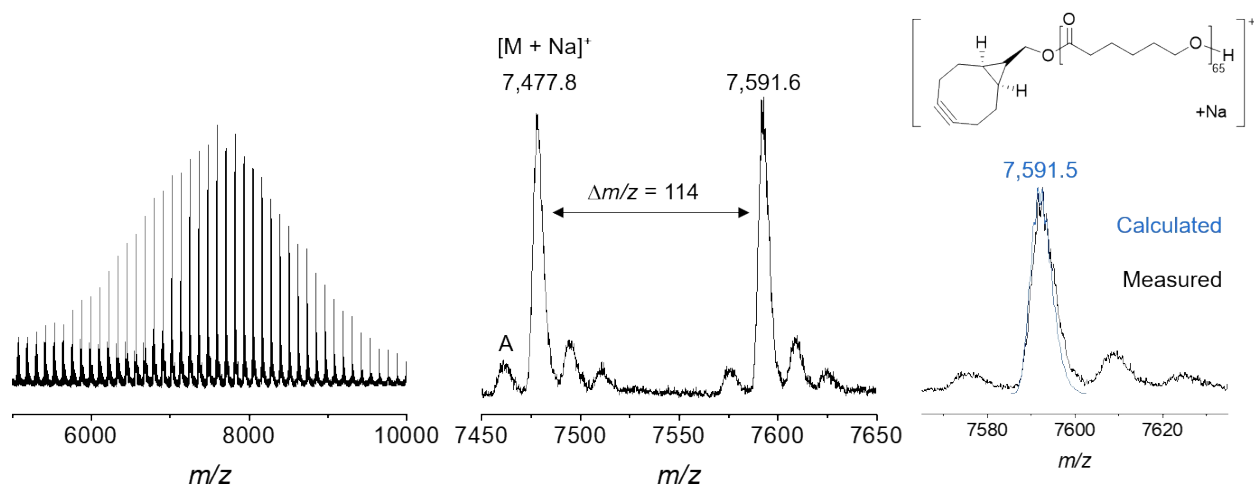

**Figure SI 7:** MALDI TOF MS analysis (matrix DCTB + NaI) of **BCN-PCL**. Left: Full spectrum. Middle: Zoom into the  $m/z$  region of one repeating unit ( $\Delta m/z = 114$ ) with the assignment of the most abundant species (A:  $[\text{HO}(\text{C}_6\text{H}_{10}\text{O}_2)_n\text{H} + \text{Na}]^+$ ). Right: Overlay of the measured and the calculated isotopic pattern of the most prominent species ( $[\text{M} + \text{Na}]^+$ ).

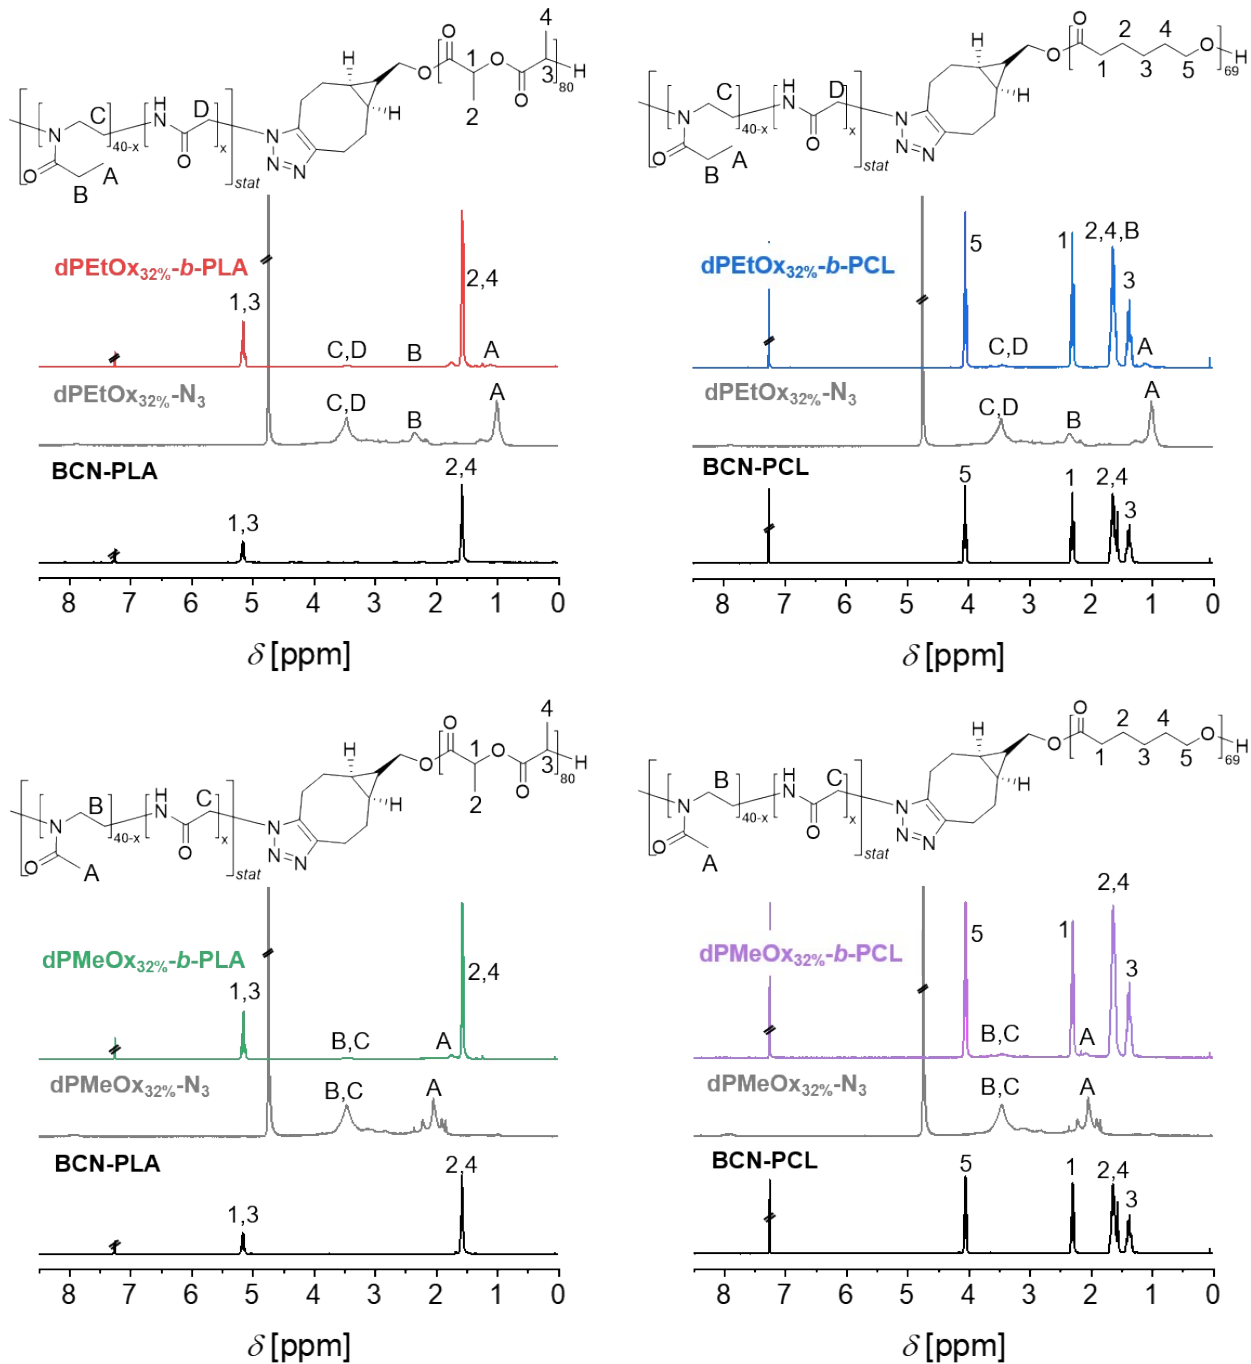

**Figure SI 8:**  $^1\text{H}$  NMR spectra (300 MHz,  $\text{D}_2\text{O}$  or  $\text{CDCl}_3$ ) of the block copolymers comprising dPAOx blocks with 32% DO **dPMeOx<sub>32%</sub>-b-PLA**, **dPEtOx<sub>32%</sub>-b-PLA**, **dPMeOx<sub>32%</sub>-b-PCL**, **dPEtOx<sub>32%</sub>-b-PCL** and the corresponding building blocks **dPMeOx<sub>32%</sub>-N<sub>3</sub>**, **dPEtOx<sub>32%</sub>-N<sub>3</sub>**, **BCN-PLA** and **BCN-PCL**, respectively, with assignment of the signals to the schematic representation of the structure.

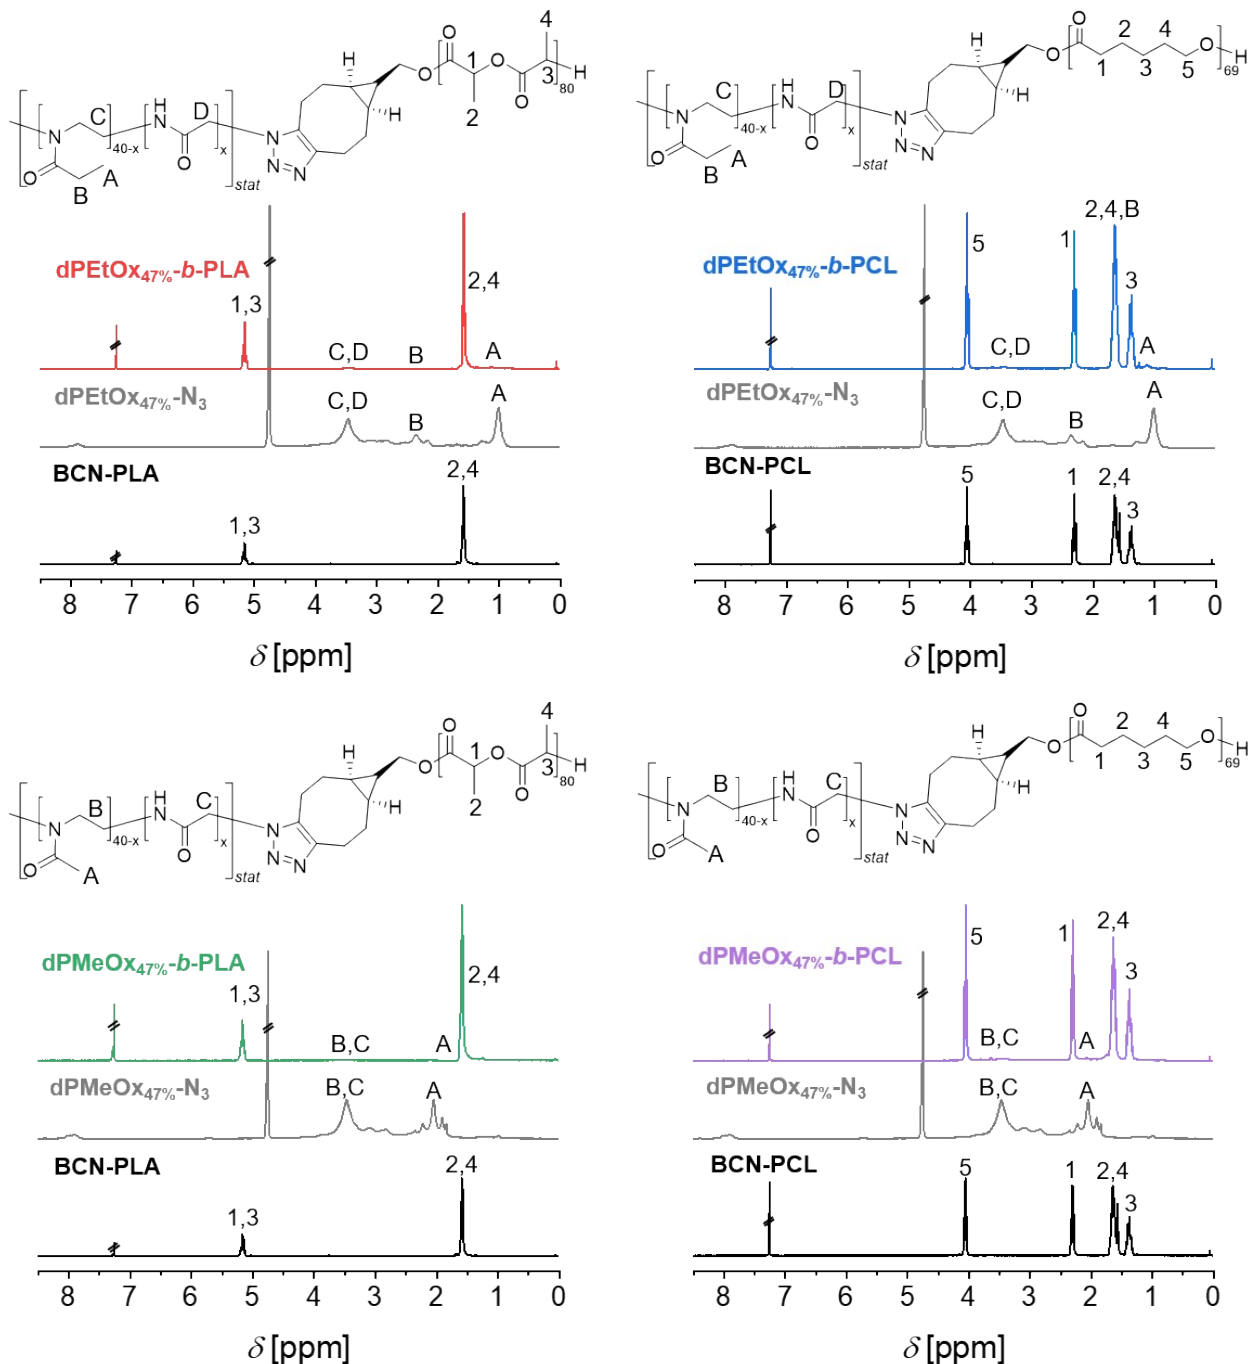

**Figure SI 9:**  $^1\text{H}$  NMR spectra (300 MHz,  $\text{D}_2\text{O}$  or  $\text{CDCl}_3$ ) of the block copolymers comprising dPAOx blocks with 47% DO  $\text{dPMeOx}_{47\%}\text{-b-PLA}$ ,  $\text{dPEtOx}_{47\%}\text{-b-PLA}$ ,  $\text{dPMeOx}_{47\%}\text{-b-PCL}$ ,  $\text{dPEtOx}_{47\%}\text{-b-PCL}$  and the corresponding building blocks  $\text{dPMeOx}_{47\%}\text{-N}_3$ ,  $\text{dPEtOx}_{47\%}\text{-N}_3$ , **BCN-PLA** and **BCN-PCL**, respectively, with assignment of the signals to the schematic representation of the structure.

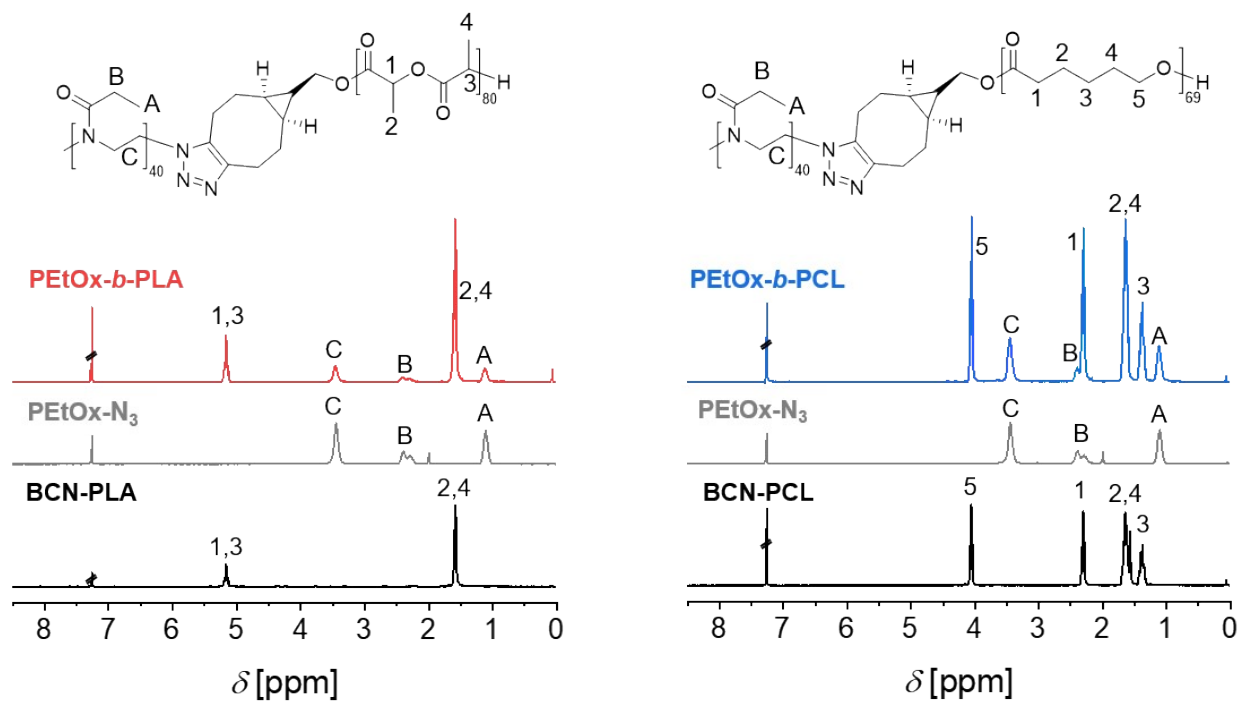

**Figure SI 10:**  $^1\text{H}$  NMR spectra (300 MHz,  $\text{CDCl}_3$ ) of the block copolymers **PETox-*b*-PLA**, **PETox-*b*-PCL** and the corresponding building blocks **PETox- $\text{N}_3$** , **BCN-PLA** and **BCN-PCL**, respectively, with assignment of the signals to the schematic representation of the structure.

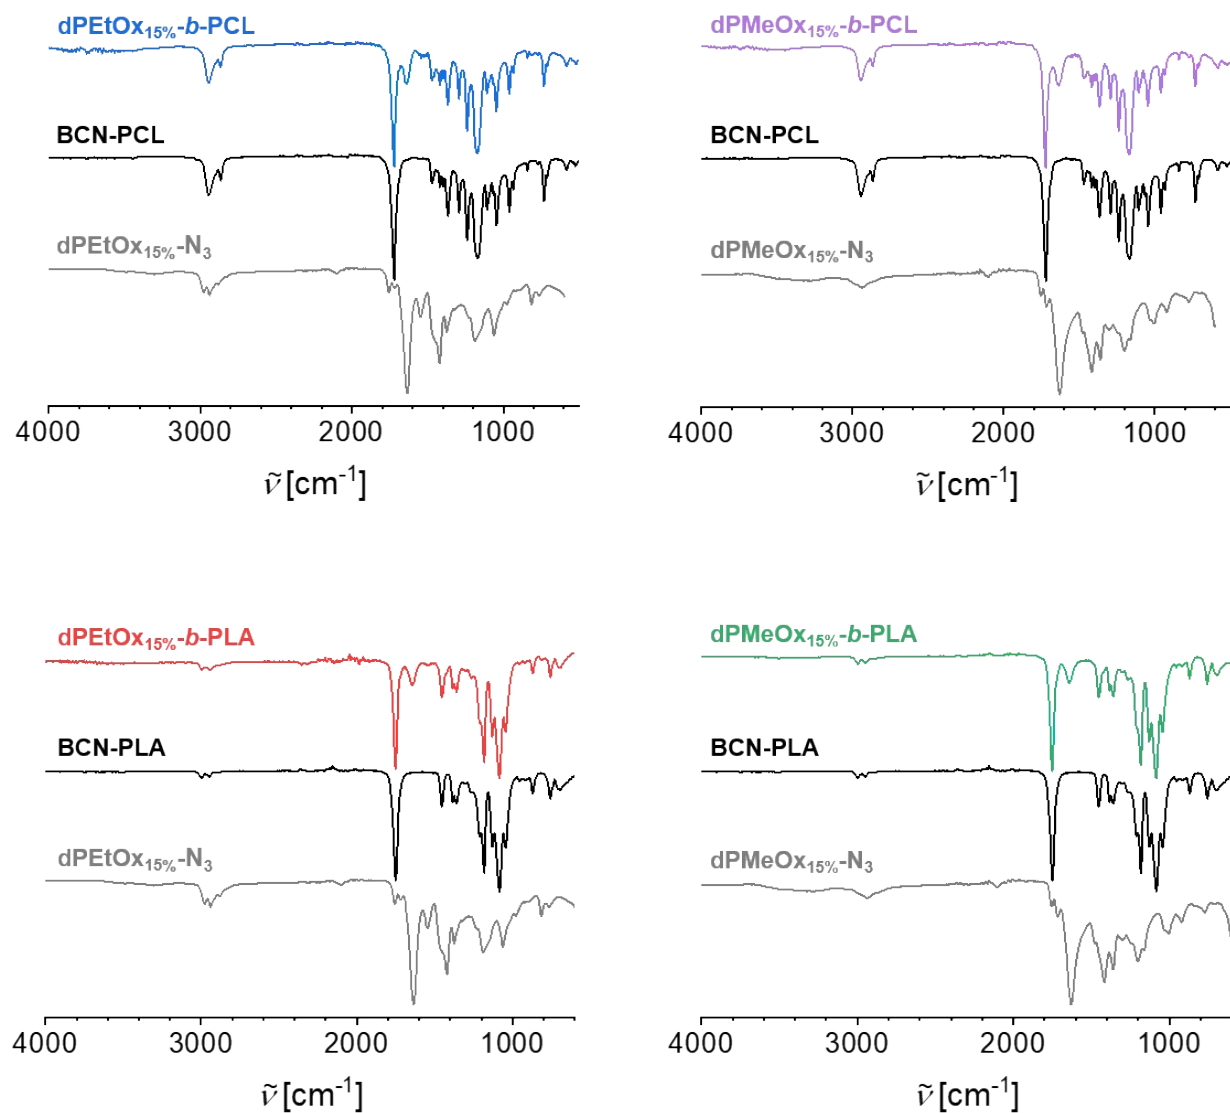

**Figure SI 11:** Overlay of the ATR-IR spectra of **dPMeOx<sub>15%</sub>-b-PLA**, **dPEtOx<sub>15%</sub>-b-PLA**, **dPMeOx<sub>15%</sub>-b-PCL**, **dPEtOx<sub>15%</sub>-b-PCL** and the corresponding building blocks **dPMeOx<sub>15%</sub>-N<sub>3</sub>**, **dPEtOx<sub>15%</sub>-N<sub>3</sub>**, **BCN-PLA** and **BCN-PCL**, respectively.

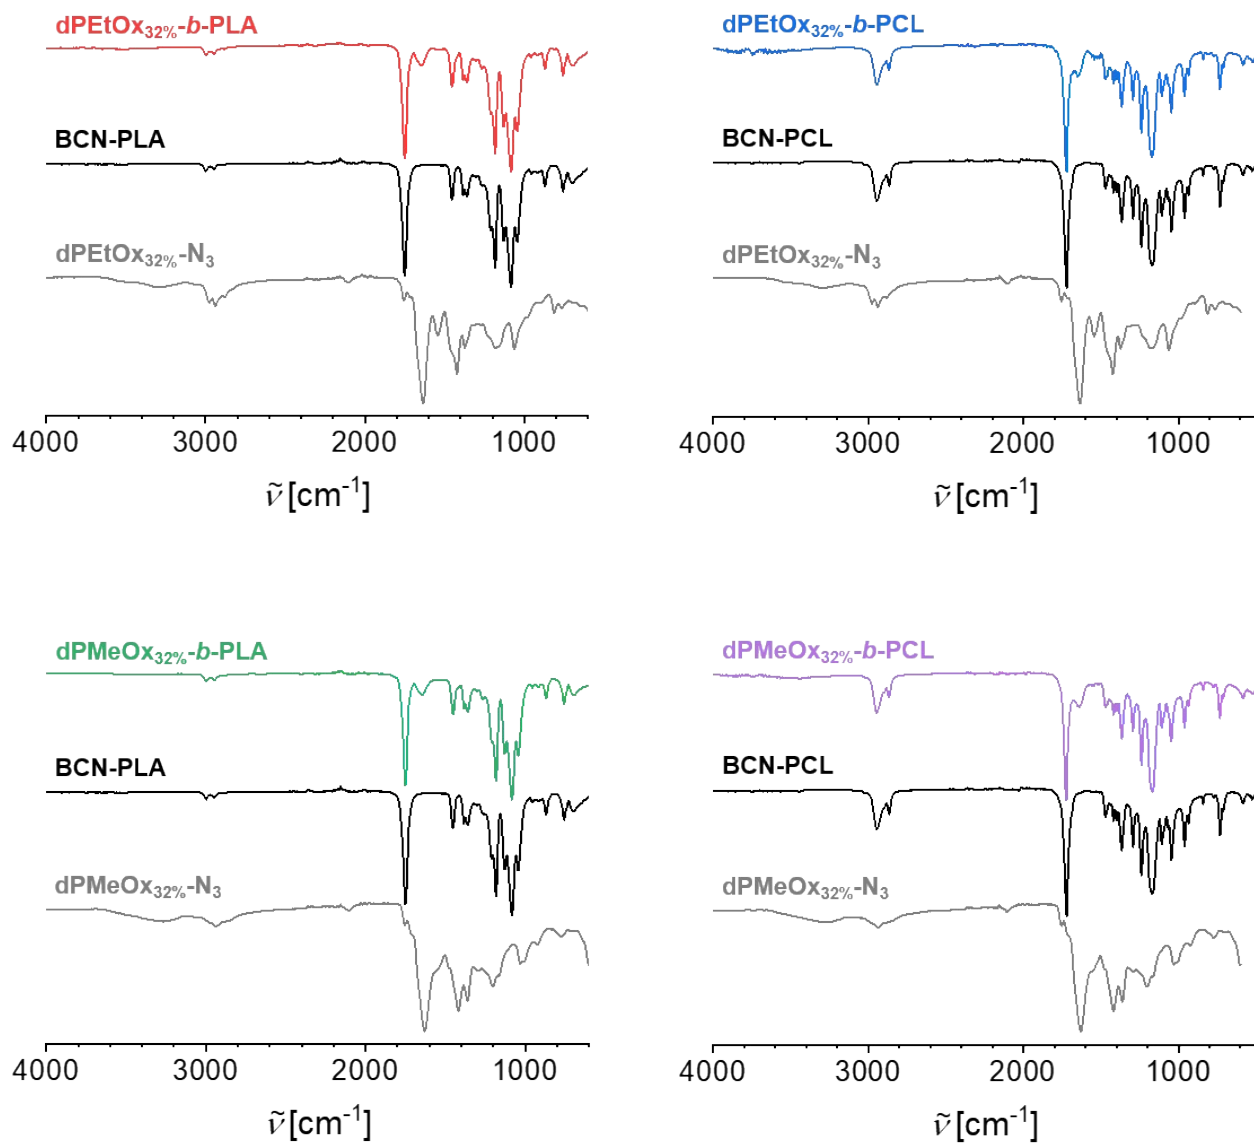

**Figure SI 12:** Overlay of the ATR-IR spectra of **dPMeOx<sub>32%</sub>-b-PLA**, **dPEtOx<sub>32%</sub>-b-PLA**, **dPMeOx<sub>32%</sub>-b-PCL**, **dPEtOx<sub>32%</sub>-b-PCL** and the corresponding building blocks **dPMeOx<sub>32%</sub>-N<sub>3</sub>**, **dPEtOx<sub>32%</sub>-N<sub>3</sub>**, **BCN-PLA** and **BCN-PCL**, respectively.

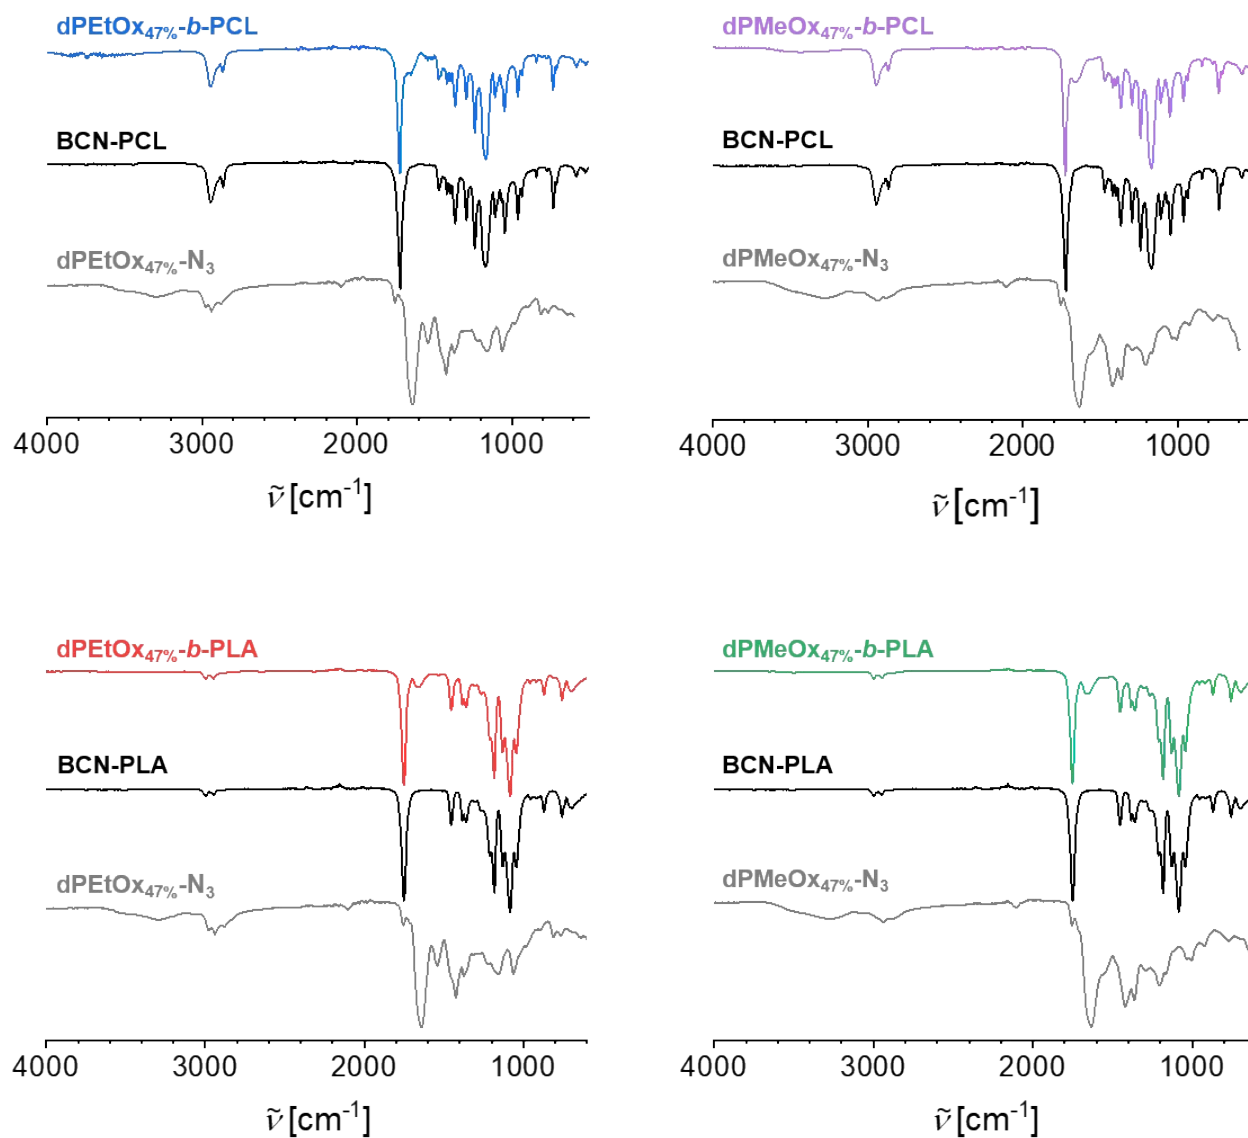

**Figure SI 13:** Overlay of the ATR-IR spectra of **dPMeOx<sub>47%</sub>-b-PLA**, **dPEtOx<sub>47%</sub>-b-PLA**, **dPMeOx<sub>47%</sub>-b-PCL**, **dPEtOx<sub>47%</sub>-b-PCL** and the corresponding building blocks **dPMeOx<sub>47%</sub>-N<sub>3</sub>**, **dPEtOx<sub>47%</sub>-N<sub>3</sub>**, **BCN-PLA** and **BCN-PCL**, respectively.



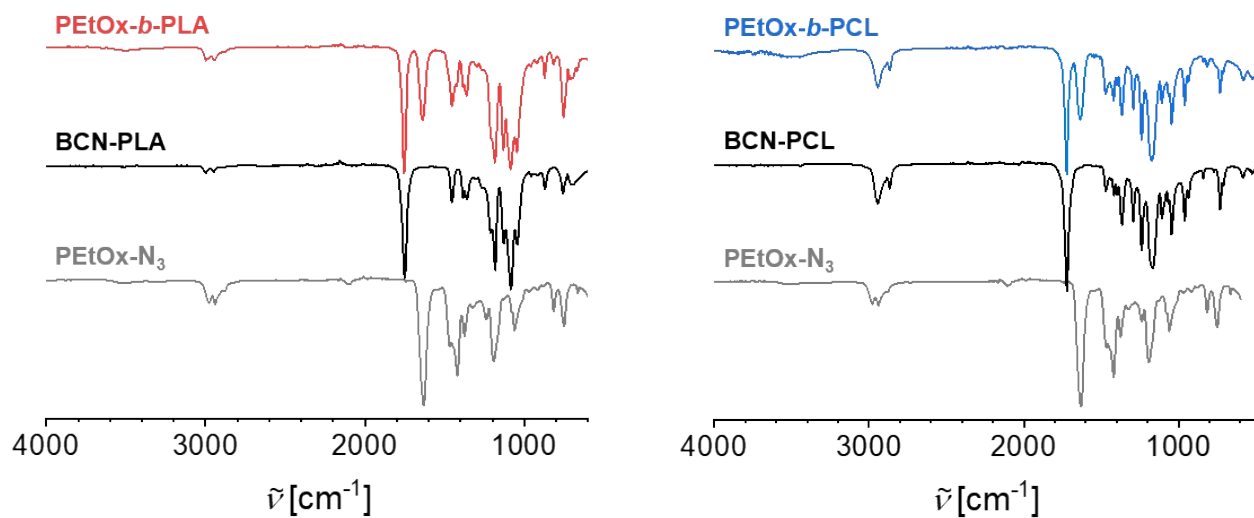

**Figure SI 14:** Overlay of the ATR-IR spectra of **PEtOx-*b*-PLA**, **PEtOx-*b*-PCL** and their building blocks **PEtOx-N<sub>3</sub>**, **BCN-PLA** and **BCN-PCL**, respectively.

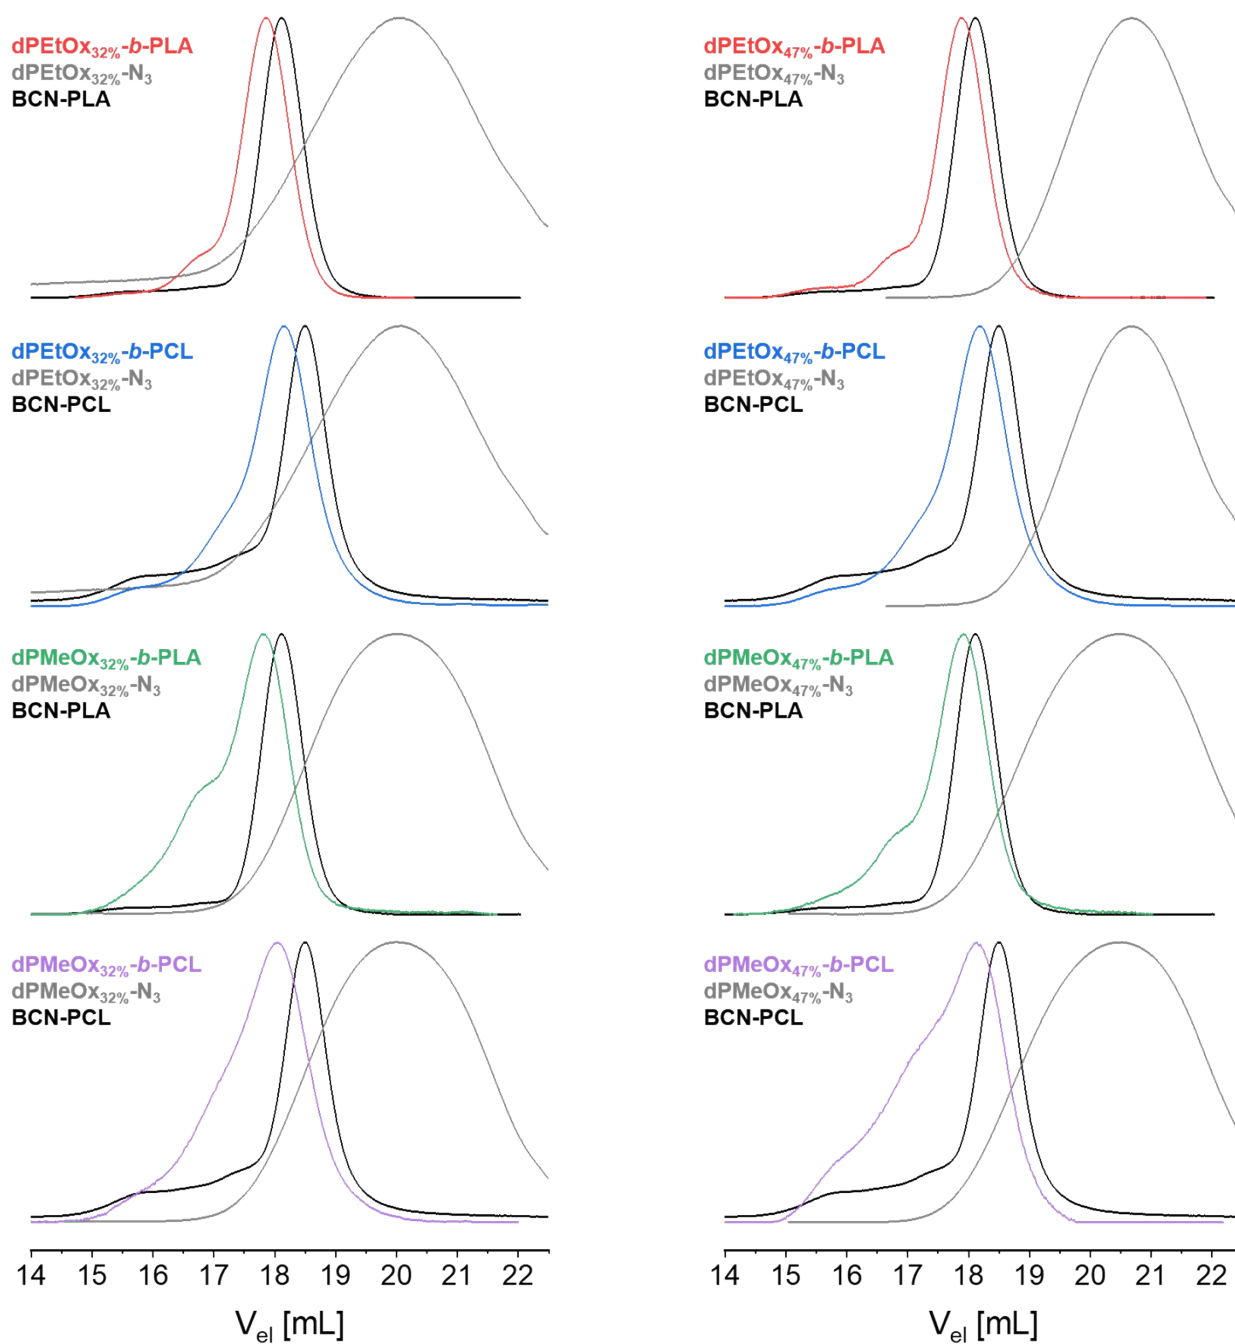

**Figure SI 15:** Overlay of the SEC elugrams (DMAC, RI detection) of the dPAOx-*b*-polyester block copolymers comprising dPAOx with 32% (left) and 47% (right) DO and the corresponding building blocks dPMeOx-N<sub>3</sub>, dPEtOx-N<sub>3</sub>, BCN-PLA and BCN-PCL.

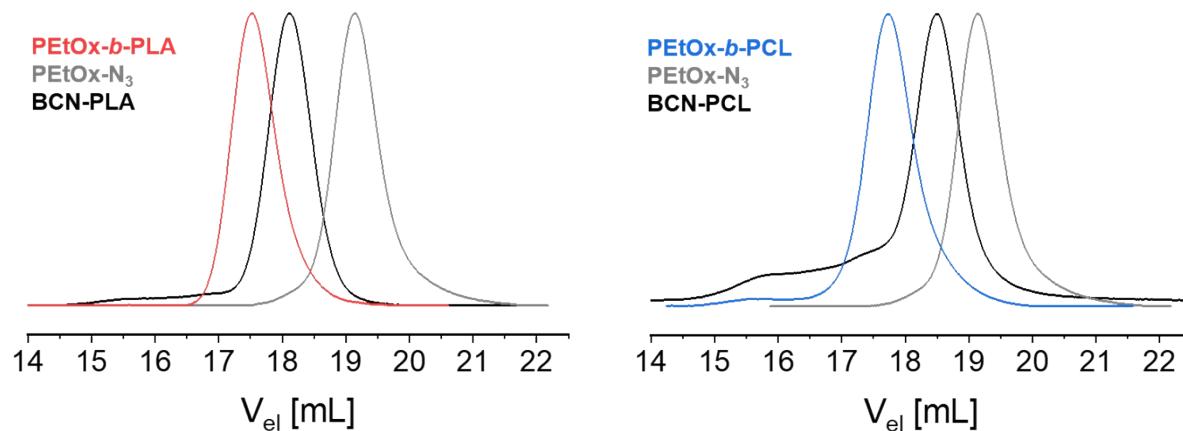

**Figure SI 16:** Overlay of the SEC elugrams (DMAc, RI detection) of the PEtOx-*b*-polyester block copolymers and the corresponding building blocks **PEtOx-N<sub>3</sub>**, **BCN-PLA** and **BCN-PCL**.

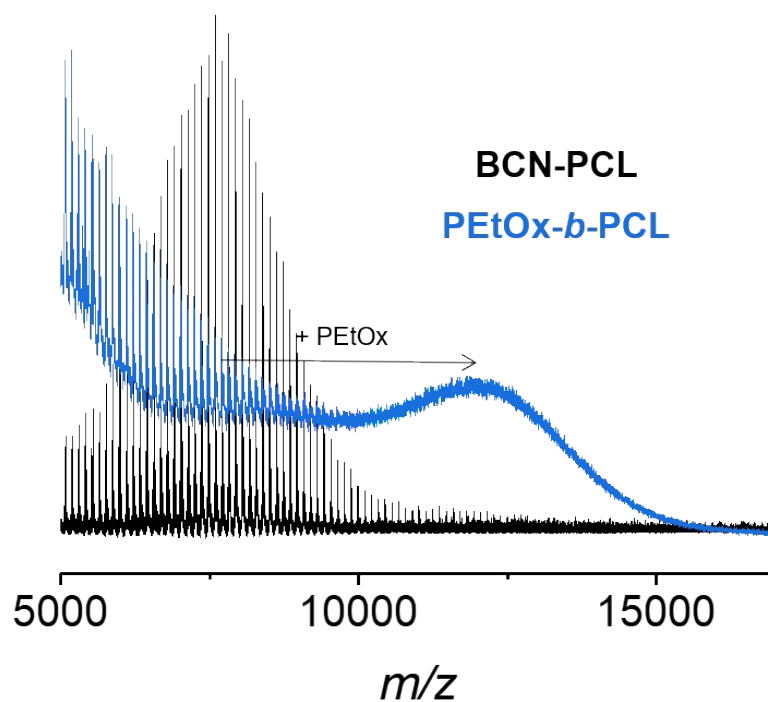

**Figure SI 17:** Overlay of the MALDI TOF mass spectra (matrix: **PEtOx-*b*-PCL**: DHB, **BCN-PCL**: DCTB + NaI) of **PEtOx-*b*-PCL** and **BCN-PCL** clearly displaying a shift towards higher  $m/z$  values, which correlates with the molar mass of **PEtOx-N<sub>3</sub>**.

## Nanoparticle data

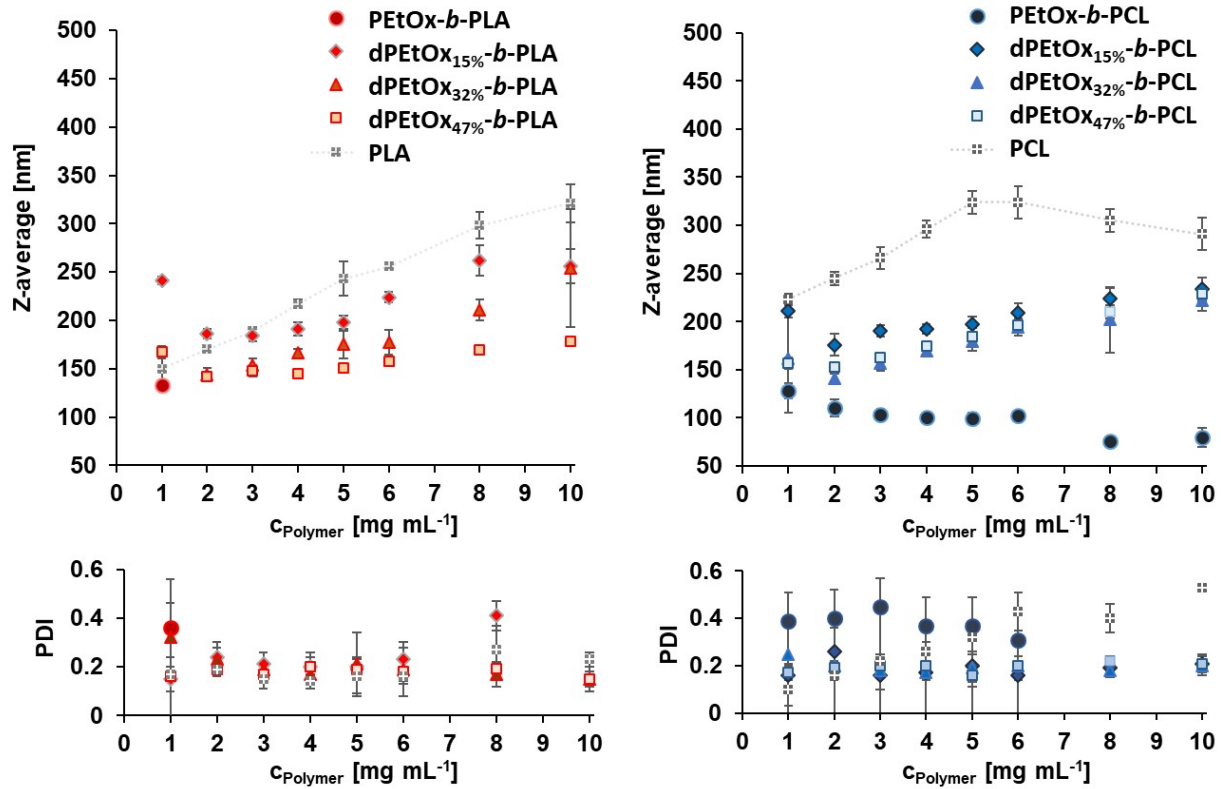

**Figure SI 18:** Mean particle sizes (z-average values) of the dPEtOx-*b*-polyesters, PEtOx-*b*-polyesters as well as PLA and PCL homopolymers (highlighted *via* dotted line) for  $n = 6$  individual formulations. The z-average values are plotted in dependency of the initial polymer concentration used for the HT-formulation. No SD bars are shown if they fall into the symbol.

**Table SI 1:** Results of the size measurements including z-average values (d in nm, upper table) and the corresponding polydispersity index (PDI, lower table) of dPEtOx-*b*-PLA particle formulations (n = 6 individual formulations, standard deviation (SD) values represent variation between these 6 independent formulations).

| Polymer<br>c<br>(mg mL <sup>-1</sup> ) | PEtOx- <i>b</i> -PLA |   |      | dPEtOx <sub>15%</sub> - <i>b</i> -PLA |   |      | dPEtOx <sub>32%</sub> - <i>b</i> -PLA |   |      | dPEtOx <sub>47%</sub> - <i>b</i> -PLA |   |      | PLA         |   |      |
|----------------------------------------|----------------------|---|------|---------------------------------------|---|------|---------------------------------------|---|------|---------------------------------------|---|------|-------------|---|------|
|                                        | d<br>(nm)            |   | SD   | d<br>(nm)                             |   | SD   | d<br>(nm)                             |   | SD   | d<br>(nm)                             |   | SD   | d<br>(nm)   |   | SD   |
| 1.00                                   | <b>133</b>           | ± | 16   | <b>241</b>                            | ± | 4    | <b>470</b>                            | ± | 351  | <b>167</b>                            | ± | 6    | <b>150</b>  | ± | 12   |
| 2.00                                   | #                    |   |      | <b>186</b>                            | ± | 5    | <b>144</b>                            | ± | 7    | <b>142</b>                            | ± | 4    | <b>170</b>  | ± | 3    |
| 3.00                                   | #                    |   |      | <b>184</b>                            | ± | 6    | <b>154</b>                            | ± | 7    | <b>148</b>                            | ± | 6    | <b>189</b>  | ± | 5    |
| 4.00                                   | #                    |   |      | <b>191</b>                            | ± | 7    | <b>166</b>                            | ± | 4    | <b>145</b>                            | ± | 3    | <b>217</b>  | ± | 3    |
| 5.00                                   | #                    |   |      | <b>198</b>                            | ± | 7    | <b>175</b>                            | ± | 14   | <b>151</b>                            | ± | 3    | <b>243</b>  | ± | 18   |
| 6.00                                   | #                    |   |      | <b>224</b>                            | ± | 5    | <b>177</b>                            | ± | 13   | <b>158</b>                            | ± | 4    | <b>256</b>  | ± | 4    |
| 8.00                                   | #                    |   |      | <b>262</b>                            | ± | 16   | <b>211</b>                            | ± | 11   | <b>169</b>                            | ± | 5    | <b>298</b>  | ± | 14   |
| 10.00                                  | #                    |   |      | <b>256</b>                            | ± | 18   | <b>254</b>                            | ± | 61   | <b>178</b>                            | ± | 4    | <b>321</b>  | ± | 20   |
| c<br>(mg mL <sup>-1</sup> )            | PDI                  |   | SD   | PDI                                   |   | SD   | PDI                                   |   | SD   | PDI                                   |   | SD   | PDI         |   | SD   |
| 1.00                                   | <b>0.36</b>          | ± | 0.20 | <b>0.15</b>                           | ± | 0.05 | <b>0.32</b>                           | ± | 0.14 | <b>0.16</b>                           | ± | 0.02 | <b>0.17</b> | ± | 0.07 |
| 2.00                                   | #                    |   |      | <b>0.24</b>                           | ± | 0.04 | <b>0.23</b>                           | ± | 0.07 | <b>0.19</b>                           | ± | 0.03 | <b>0.19</b> | ± | 0.03 |
| 3.00                                   | #                    |   |      | <b>0.21</b>                           | ± | 0.05 | <b>0.19</b>                           | ± | 0.03 | <b>0.17</b>                           | ± | 0.02 | <b>0.15</b> | ± | 0.04 |
| 4.00                                   | #                    |   |      | <b>0.20</b>                           | ± | 0.04 | <b>0.17</b>                           | ± | 0.04 | <b>0.20</b>                           | ± | 0.06 | <b>0.14</b> | ± | 0.03 |
| 5.00                                   | #                    |   |      | <b>0.20</b>                           | ± | 0.04 | <b>0.21</b>                           | ± | 0.13 | <b>0.19</b>                           | ± | 0.04 | <b>0.16</b> | ± | 0.07 |
| 6.00                                   | #                    |   |      | <b>0.23</b>                           | ± | 0.05 | <b>0.19</b>                           | ± | 0.11 | <b>0.18</b>                           | ± | 0.04 | <b>0.16</b> | ± | 0.03 |
| 8.00                                   | #                    |   |      | <b>0.41</b>                           | ± | 0.06 | <b>0.17</b>                           | ± | 0.05 | <b>0.19</b>                           | ± | 0.02 | <b>0.27</b> | ± | 0.10 |
| 10.00                                  | #                    |   |      | #                                     |   |      | <b>0.15</b>                           | ± | 0.05 | <b>0.15</b>                           | ± | 0.03 | <b>0.23</b> | ± | 0.03 |

# Data not available due to aggregation, no reliable particle formulation or sufficient particle concentration.

**Table SI 2:** Results of the size measurements including z-average values (d in nm, upper table) and the corresponding polydispersity index (PDI, lower table) of dPEtOx-*b*-PLA particle formulations (n = 6 individual formulations, SD values represent variation between these 6 independent formulations).

| Polymer<br>c<br>(mg mL <sup>-1</sup> ) | PEtOx- <i>b</i> -PCL |   |      | dPEtOx <sub>15%</sub> - <i>b</i> -PCL |   |      | dPEtOx <sub>32%</sub> - <i>b</i> -PCL |   |      | dPEtOx <sub>47%</sub> - <i>b</i> -PCL |   |      | PCL         |   |      |
|----------------------------------------|----------------------|---|------|---------------------------------------|---|------|---------------------------------------|---|------|---------------------------------------|---|------|-------------|---|------|
|                                        | d<br>(nm)            |   | SD   | d<br>(nm)                             |   | SD   | d<br>(nm)                             |   | SD   | d<br>(nm)                             |   | SD   | d<br>(nm)   |   | SD   |
| 1.00                                   | <b>128</b>           | ± | 8    | <b>211</b>                            | ± | 7    | <b>162</b>                            | ± | 57   | <b>157</b>                            | ± | 6    | <b>223</b>  | ± | 6    |
| 2.00                                   | <b>110</b>           | ± | 9    | <b>176</b>                            | ± | 11   | <b>141</b>                            | ± | 5    | <b>153</b>                            | ± | 3    | <b>245</b>  | ± | 7    |
| 3.00                                   | <b>103</b>           | ± | 6    | <b>190</b>                            | ± | 6    | <b>157</b>                            | ± | 8    | <b>163</b>                            | ± | 4    | <b>266</b>  | ± | 11   |
| 4.00                                   | <b>100</b>           | ± | 3    | <b>192</b>                            | ± | 5    | <b>170</b>                            | ± | 5    | <b>175</b>                            | ± | 3    | <b>296</b>  | ± | 9    |
| 5.00                                   | <b>99</b>            | ± | 6    | <b>197</b>                            | ± | 8    | <b>179</b>                            | ± | 9    | <b>184</b>                            | ± | 9    | <b>324</b>  | ± | 12   |
| 6.00                                   | <b>102</b>           | ± | 3    | <b>209</b>                            | ± | 10   | <b>194</b>                            | ± | 9    | <b>196</b>                            | ± | 6    | <b>324</b>  | ± | 17   |
| 8.00                                   | #                    |   |      | <b>224</b>                            | ± | 11   | <b>202</b>                            | ± | 34   | <b>210</b>                            | ± | 7    | <b>305</b>  | ± | 12   |
| 10.00                                  | #                    |   |      | <b>234</b>                            | ± | 12   | <b>222</b>                            | ± | 11   | <b>229</b>                            | ± | 8    | <b>291</b>  | ± | 17   |
| c<br>(mg mL <sup>-1</sup> )            | PDI                  |   | SD   | PDI                                   |   | SD   | PDI                                   |   | SD   | PDI                                   |   | SD   | PDI         |   | SD   |
| 1.00                                   | <b>0.39</b>          | ± | 0.12 | <b>0.16</b>                           | ± | 0.05 | <b>0.25</b>                           | ± | 0.11 | <b>0.17</b>                           | ± | 0.03 | <b>0.10</b> | ± | 0.07 |
| 2.00                                   | <b>0.40</b>          | ± | 0.10 | <b>0.26</b>                           | ± | 0.10 | <b>0.20</b>                           | ± | 0.05 | <b>0.19</b>                           | ± | 0.03 | <b>0.16</b> | ± | 0.02 |
| 3.00                                   | <b>0.45</b>          | ± | 0.06 | <b>0.16</b>                           | ± | 0.06 | <b>0.18</b>                           | ± | 0.03 | <b>0.20</b>                           | ± | 0.02 | <b>0.22</b> | ± | 0.03 |
| 4.00                                   | <b>0.37</b>          | ± | 0.09 | <b>0.17</b>                           | ± | 0.03 | <b>0.17</b>                           | ± | 0.03 | <b>0.20</b>                           | ± | 0.06 | <b>0.26</b> | ± | 0.04 |
| 5.00                                   | <b>0.37</b>          | ± | 0.06 | <b>0.20</b>                           | ± | 0.06 | <b>0.19</b>                           | ± | 0.06 | <b>0.16</b>                           | ± | 0.05 | <b>0.32</b> | ± | 0.07 |
| 6.00                                   | <b>0.31</b>          | ± | 0.05 | <b>0.16</b>                           | ± | 0.02 | <b>0.20</b>                           | ± | 0.04 | <b>0.20</b>                           | ± | 0.04 | <b>0.43</b> | ± | 0.08 |
| 8.00                                   | #                    |   |      | <b>0.19</b>                           | ± | 0.03 | <b>0.18</b>                           | ± | 0.03 | <b>0.22</b>                           | ± | 0.02 | <b>0.40</b> | ± | 0.06 |
| 10.00                                  | #                    |   |      | <b>0.21</b>                           | ± | 0.04 | <b>0.20</b>                           | ± | 0.04 | <b>0.21</b>                           | ± | 0.03 | <b>0.53</b> | ± | 0.01 |

# Data not available due to aggregation, no reliable particle formulation or sufficient particle concentration.

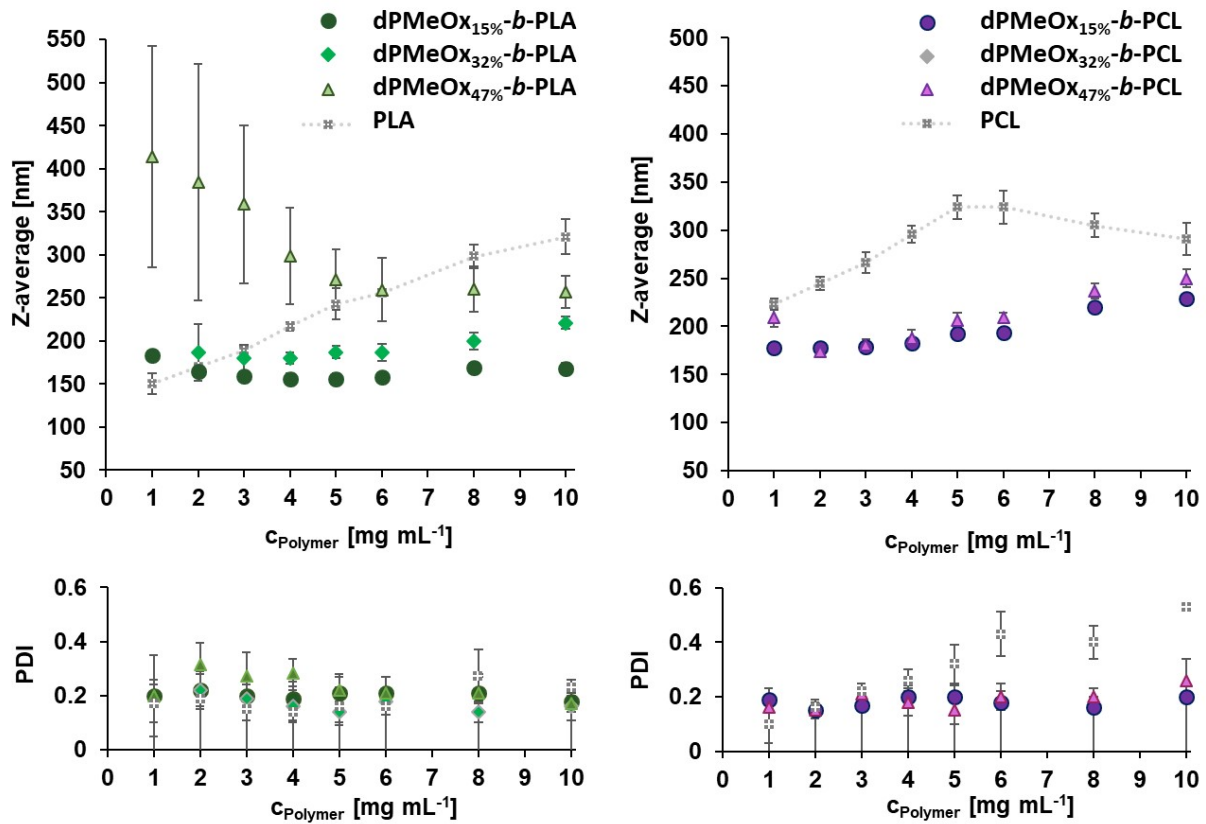

**Figure SI 19:** Mean particle sizes (z-average value) of the dPMeOx-*b*-polyesters as well as PLA and PCL homopolymers (highlighted *via* dotted line) for  $n = 6$  individual formulations. The z-average values are plotted in dependency of the initial polymer concentration used for the HT-formulation. No SD bars are shown if they fall into the symbol.

**Table SI 3:** Results of the size measurements including z-average values (d in nm, upper table) and the corresponding polydispersity index (PDI, lower table) of dPMeOx-*b*-PLA particle formulations (n = 6 individual formulations, SD values represent variation between these 6 independent formulations).

| Polymer<br>c (mg mL <sup>-1</sup> ) | dPMeOx <sub>15%</sub> - <i>b</i> -PLA |   |    | dPMeOx <sub>32%</sub> - <i>b</i> -PLA |   |     | dPMeOx <sub>47%</sub> - <i>b</i> -PLA |   |     | PLA        |   |    |
|-------------------------------------|---------------------------------------|---|----|---------------------------------------|---|-----|---------------------------------------|---|-----|------------|---|----|
|                                     | d (nm)                                |   | SD | d (nm)                                |   | SD  | d (nm)                                |   | SD  | d (nm)     |   | SD |
| 1.00                                | <b>183</b>                            | ± | 6  | <b>502</b>                            | ± | 427 | <b>414</b>                            | ± | 129 | <b>150</b> | ± | 12 |
| 2.00                                | <b>165</b>                            | ± | 5  | <b>187</b>                            | ± | 33  | <b>384</b>                            | ± | 137 | <b>170</b> | ± | 2  |
| 3.00                                | <b>159</b>                            | ± | 4  | <b>180</b>                            | ± | 15  | <b>359</b>                            | ± | 92  | <b>189</b> | ± | 4  |
| 4.00                                | <b>156</b>                            | ± | 4  | <b>180</b>                            | ± | 7   | <b>298</b>                            | ± | 56  | <b>217</b> | ± | 5  |
| 5.00                                | <b>156</b>                            | ± | 4  | <b>187</b>                            | ± | 7   | <b>271</b>                            | ± | 35  | <b>243</b> | ± | 18 |
| 6.00                                | <b>158</b>                            | ± | 6  | <b>187</b>                            | ± | 10  | <b>259</b>                            | ± | 37  | <b>256</b> | ± | 4  |
| 8.00                                | <b>169</b>                            | ± | 6  | <b>200</b>                            | ± | 10  | <b>260</b>                            | ± | 26  | <b>298</b> | ± | 14 |
| 10.00                               | <b>168</b>                            | ± | 4  | <b>221</b>                            | ± | 7   | <b>257</b>                            | ± | 19  | <b>321</b> | ± | 20 |

  

| c (mg mL <sup>-1</sup> ) | PDI         |   | SD   |
|--------------------------|-------------|---|------|-------------|---|------|-------------|---|------|-------------|---|------|
| 1.00                     | <b>0.20</b> | ± | 0.06 | <b>0.21</b> | ± | 0.07 | <b>0.20</b> | ± | 0.15 | <b>0.17</b> | ± | 0.07 |
| 2.00                     | <b>0.22</b> | ± | 0.05 | <b>0.22</b> | ± | 0.07 | <b>0.32</b> | ± | 0.08 | <b>0.19</b> | ± | 0.03 |
| 3.00                     | <b>0.20</b> | ± | 0.04 | <b>0.19</b> | ± | 0.05 | <b>0.27</b> | ± | 0.09 | <b>0.15</b> | ± | 0.04 |
| 4.00                     | <b>0.19</b> | ± | 0.02 | <b>0.16</b> | ± | 0.06 | <b>0.28</b> | ± | 0.05 | <b>0.14</b> | ± | 0.03 |
| 5.00                     | <b>0.21</b> | ± | 0.06 | <b>0.14</b> | ± | 0.04 | <b>0.22</b> | ± | 0.06 | <b>0.16</b> | ± | 0.07 |
| 6.00                     | <b>0.21</b> | ± | 0.04 | <b>0.18</b> | ± | 0.03 | <b>0.21</b> | ± | 0.06 | <b>0.16</b> | ± | 0.03 |
| 8.00                     | <b>0.21</b> | ± | 0.03 | <b>0.14</b> | ± | 0.04 | <b>0.21</b> | ± | 0.07 | <b>0.27</b> | ± | 0.10 |
| 10.00                    | <b>0.18</b> | ± | 0.04 | <b>0.16</b> | ± | 0.05 | <b>0.17</b> | ± | 0.03 | <b>0.23</b> | ± | 0.03 |



**Table SI 4:** Results of the size measurements including z-average values (d in nm, upper table) and the corresponding polydispersity index (PDI, lower table) of dPMeOx-*b*-PCL particle formulations (n = 6 individual formulations, SD values represent variation between these 6 independent formulations).

| Polymer<br>c (mg mL <sup>-1</sup> ) | dPMeOx <sub>15%</sub> - <i>b</i> -PCL |   |    | dPMeOx <sub>32%</sub> - <i>b</i> -PCL |   |     | dPMeOx <sub>47%</sub> - <i>b</i> -PCL |   |    | PCL        |   |    |
|-------------------------------------|---------------------------------------|---|----|---------------------------------------|---|-----|---------------------------------------|---|----|------------|---|----|
|                                     | d (nm)                                |   | SD | d (nm)                                |   | SD  | d (nm)                                |   | SD | d (nm)     |   | SD |
| 1.00                                | <b>178</b>                            | ± | 3  | 667                                   | ± | 90  | <b>209</b>                            | ± | 10 | <b>223</b> | ± | 6  |
| 2.00                                | <b>178</b>                            | ± | 1  | 809                                   | ± | 51  | <b>174</b>                            | ± | 4  | <b>245</b> | ± | 7  |
| 3.00                                | <b>179</b>                            | ± | 3  | #                                     |   |     | <b>181</b>                            | ± | 6  | <b>266</b> | ± | 11 |
| 4.00                                | <b>183</b>                            | ± | 7  | 773                                   | ± | 270 | <b>188</b>                            | ± | 8  | <b>296</b> | ± | 9  |
| 5.00                                | <b>193</b>                            | ± | 7  | 509                                   | ± | 117 | <b>206</b>                            | ± | 8  | <b>324</b> | ± | 12 |
| 6.00                                | <b>194</b>                            | ± | 9  | 759                                   | ± | 334 | <b>209</b>                            | ± | 5  | <b>324</b> | ± | 17 |
| 8.00                                | <b>220</b>                            | ± | 9  | 968                                   | ± | 240 | <b>237</b>                            | ± | 8  | <b>305</b> | ± | 12 |
| 10.00                               | <b>229</b>                            | ± | 7  | #                                     |   |     | <b>250</b>                            | ± | 9  | <b>291</b> | ± | 17 |

| c (mg mL <sup>-1</sup> ) | PDI         |   | SD   | PDI  |   | SD   | PDI         |   | SD   | PDI         |   | SD   |
|--------------------------|-------------|---|------|------|---|------|-------------|---|------|-------------|---|------|
| 1.00                     | <b>0.19</b> | ± | 0.04 | 0.35 | ± | 0.00 | <b>0.16</b> | ± | 0.02 | <b>0.10</b> | ± | 0.07 |
| 2.00                     | <b>0.15</b> | ± | 0.02 | 0.38 | ± | 0.00 | <b>0.15</b> | ± | 0.03 | <b>0.16</b> | ± | 0.02 |
| 3.00                     | <b>0.17</b> | ± | 0.03 | 0.53 | ± | 0.02 | <b>0.21</b> | ± | 0.02 | <b>0.22</b> | ± | 0.03 |
| 4.00                     | <b>0.20</b> | ± | 0.04 | 0.47 | ± | 0.02 | <b>0.18</b> | ± | 0.05 | <b>0.26</b> | ± | 0.04 |
| 5.00                     | <b>0.20</b> | ± | 0.02 | #    |   |      | <b>0.15</b> | ± | 0.05 | <b>0.32</b> | ± | 0.07 |
| 6.00                     | <b>0.18</b> | ± | 0.04 | 0.47 | ± | 0.00 | <b>0.20</b> | ± | 0.05 | <b>0.43</b> | ± | 0.08 |
| 8.00                     | <b>0.16</b> | ± | 0.06 | #    |   |      | <b>0.20</b> | ± | 0.03 | <b>0.40</b> | ± | 0.06 |
| 10.00                    | <b>0.20</b> | ± | 0.02 | #    |   |      | <b>0.26</b> | ± | 0.08 | <b>0.53</b> | ± | 0.01 |

# Data not available due to aggregation or no reliable particle formulation.

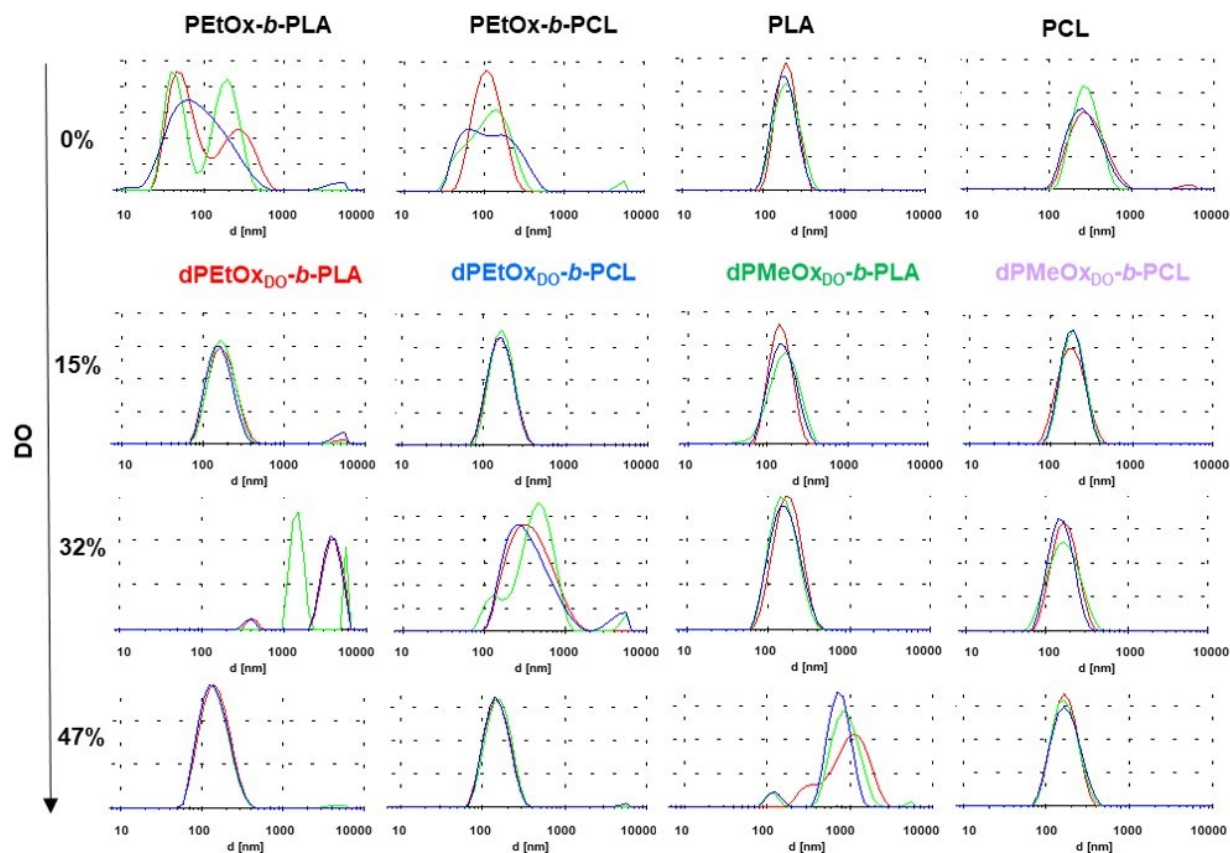

**Figure SI 20:** Intensity based size distributions of particles suspensions prepared with  $3 \text{ mg mL}^{-1}$  concentration in dependency of the degree of oxidation.

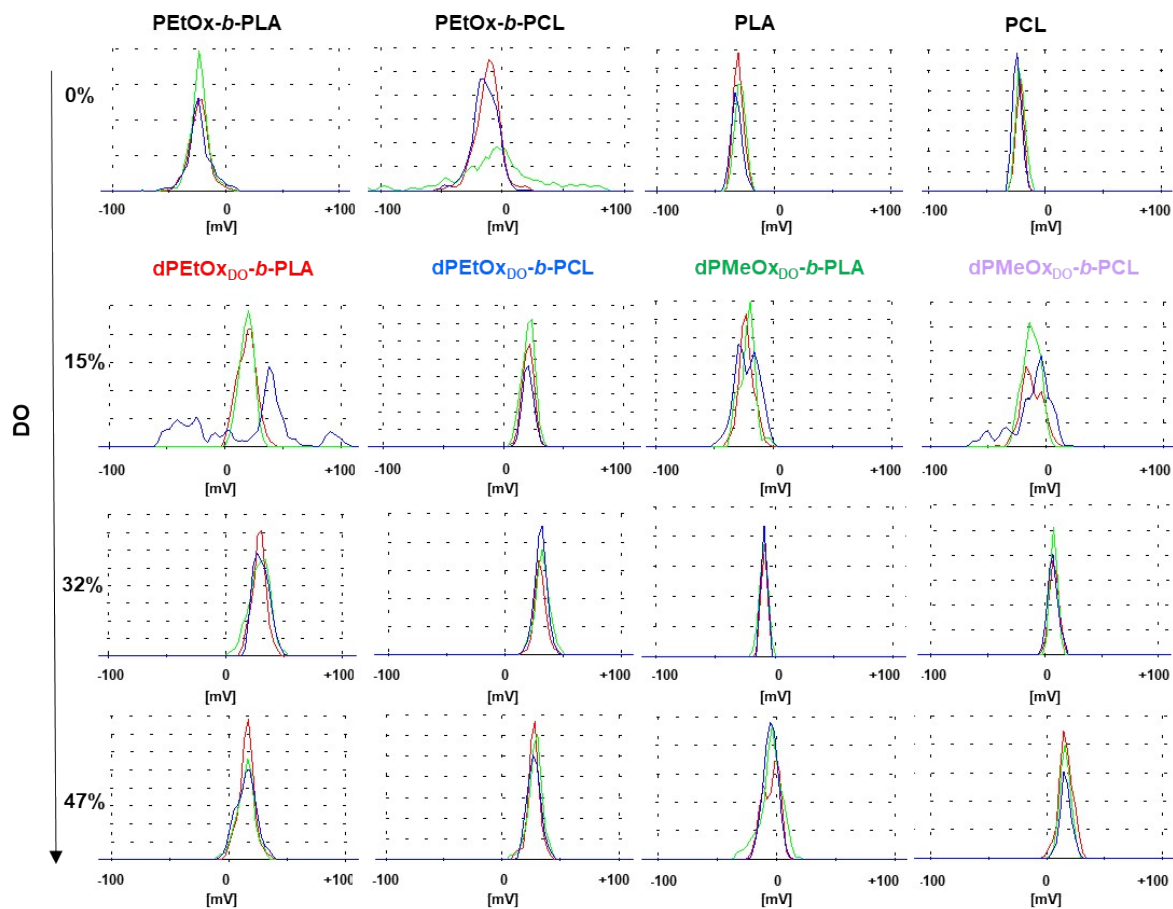

**Figure SI 21:** Zeta potential graphs of particles suspensions prepared with  $3 \text{ mg mL}^{-1}$  concentration in dependency of the degree of oxidation.

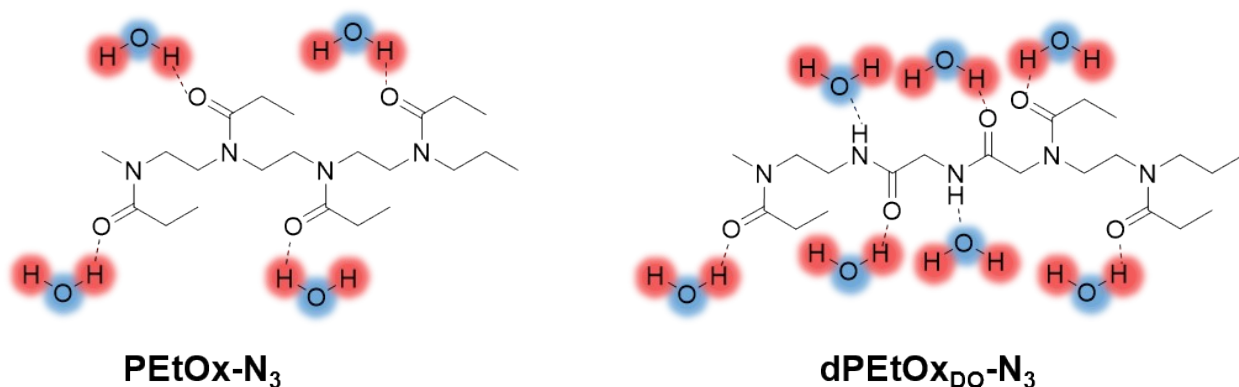

**Figure SI 22:** Schematic representation of possible hydrogen bond binding sites in the structures of PETox and dPETox. Hydrogen bond donating amide moieties are introduced through the glycine moieties in dPETox.

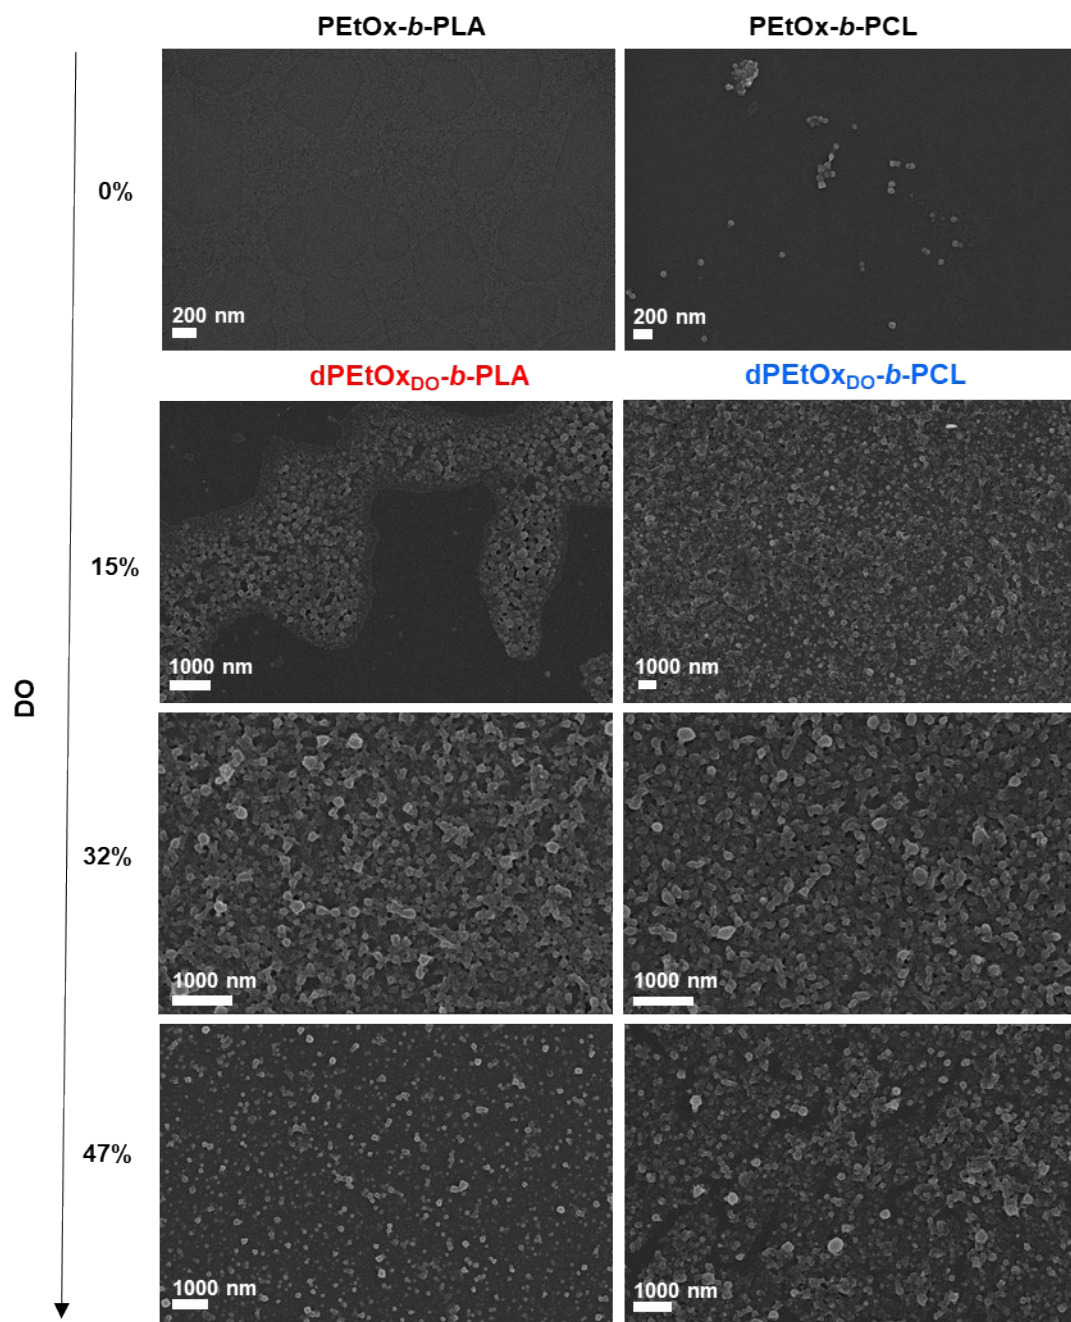

**Figure SI 23:** SEM images of particles formulated with 3 mg mL<sup>-1</sup> initial polymer concentration.

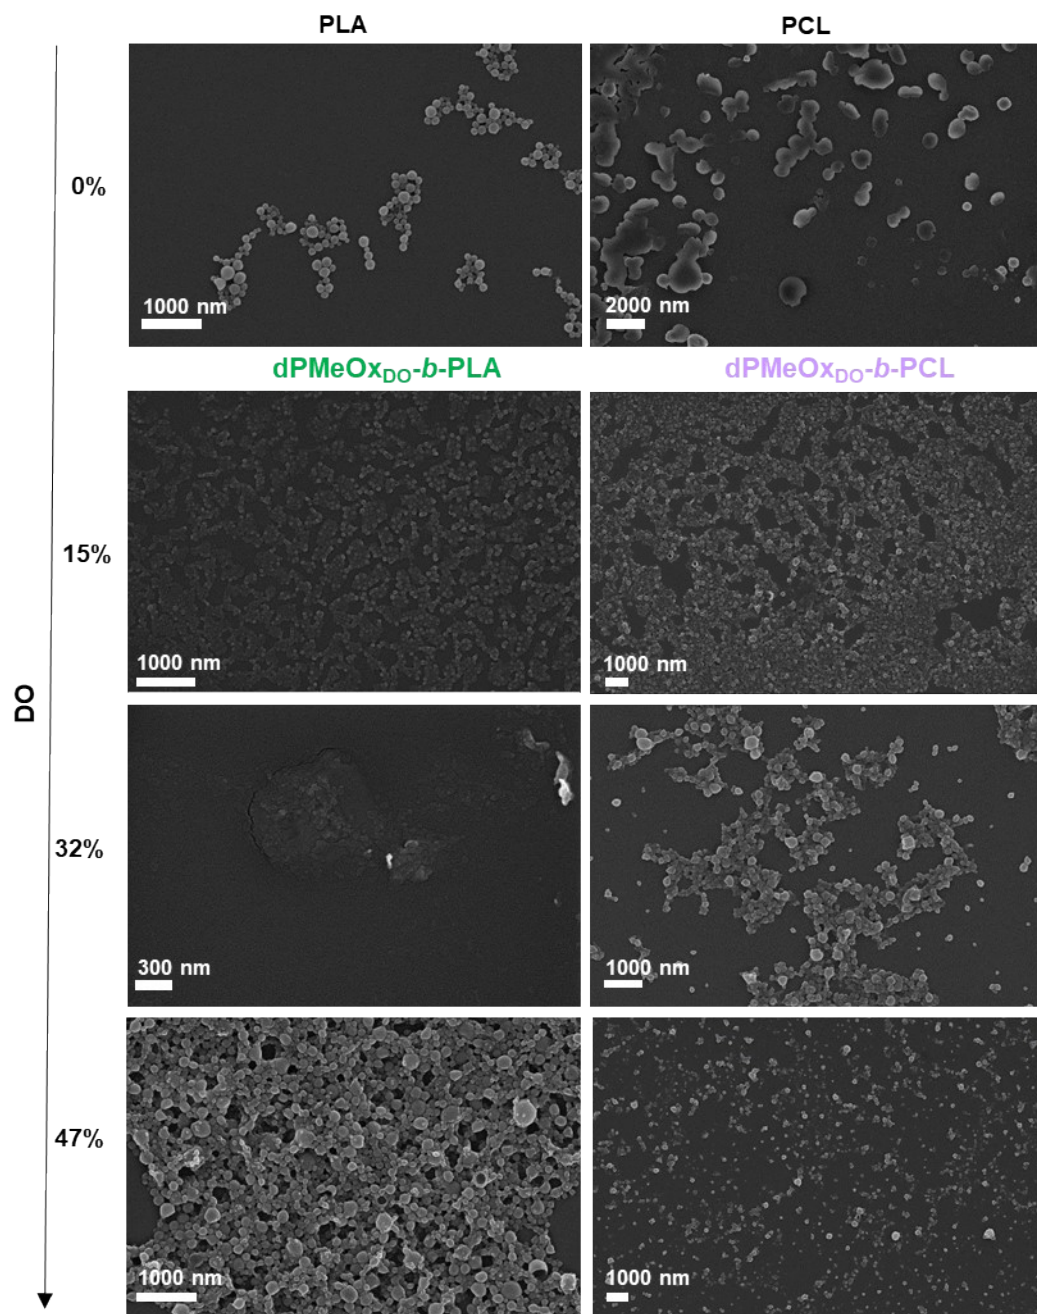

**Figure SI 24:** SEM images of particles formulated with  $3 \text{ mg mL}^{-1}$  initial polymer concentration.

**Table SI 5:** Evaluation of the particle formulation in dependency of the resulting dispersity of the size distribution. Green – successful and reliable particle formulation achieved; yellow – particle formulation possible, but the tendency of aggregation at higher concentrations; red – particle formulation critical or not successful.

| <b>P</b> | <b>Polymer</b>                        | <b>F#</b> |
|----------|---------------------------------------|-----------|
| 1        | BCN-PLA                               | Green     |
| 2        | PEtOx- <i>b</i> -PLA                  | Red       |
| 3        | dPMeOx <sub>15%</sub> - <i>b</i> -PLA | Green     |
| 4        | dPEtOx <sub>15%</sub> - <i>b</i> -PLA | Yellow    |
| 5        | dPMeOx <sub>32%</sub> - <i>b</i> -PLA | Green     |
| 6        | dPEtOx <sub>32%</sub> - <i>b</i> -PLA | Green     |
| 7        | dPMeOx <sub>47%</sub> - <i>b</i> -PLA | Yellow    |
| 8        | dPEtOx <sub>47%</sub> - <i>b</i> -PLA | Green     |
| 9        | BCN-PCL                               | Yellow    |
| 10       | PEtOx- <i>b</i> -PCL                  | Red       |
| 11       | dPMeOx <sub>15%</sub> - <i>b</i> -PCL | Green     |
| 12       | dPEtOx <sub>15%</sub> - <i>b</i> -PCL | Green     |
| 13       | dPMeOx <sub>32%</sub> - <i>b</i> -PCL | Red       |
| 14       | dPEtOx <sub>32%</sub> - <i>b</i> -PCL | Green     |
| 15       | dPMeOx <sub>47%</sub> - <i>b</i> -PCL | Green     |
| 16       | dPEtOx <sub>47%</sub> - <i>b</i> -PCL | Green     |

## References

1. M. Litt, A. Levy and J. Herz, *J. Macromol. Sci., Chem*, 1975, **9**, 703–727.
2. B. Verbraeken, B. D. Monnery, K. Lava and R. Hoogenboom, *Eur. Polym. J.*, 2017, **88**, 451–469.
3. S. Osawa, T. Ishii, H. Takemoto, K. Osada and K. Kataoka, *Eur. Polym. J.*, 2017, **88**, 553–561.
